# Supplementary material for: Design, synthesis, antifungal activity and 3D-QSAR study of novel pyrazole carboxamide and niacinamide derivatives containing benzimidazole moiety
Source: Royal Society of Chemistry journal article supplement (doi:10.1039/c8nj05150j), 2019-01-01

## Design, synthesis, antifungal activity and 3D-QSAR study of novel pyrazole carboxamide and niacinamide derivatives containing benzimidazole moiety

Wei-Jie Si,<sup>abc</sup> Xiao-bin Wang,<sup>ab</sup> Min Chen,<sup>ab</sup> Meng-Qi Wang,<sup>a</sup> Ai-Min Lu<sup>a</sup> and Chun-Long Yang<sup>abc\*</sup>

<sup>a</sup> Department of Chemistry, College of Sciences, Nanjing Agricultural University, Nanjing 210095, China

<sup>b</sup> Jiangsu Key Laboratory of Pesticide Science, Nanjing Agricultural University, Nanjing 210095, China

<sup>c</sup> Key Laboratory of Monitoring and Management of Crop Diseases and Pest Insects, Ministry of Agriculture, Nanjing Agricultural University, Nanjing 210095, China

\*Correspondence to: Chun-Long Yang, College of Sciences, Nanjing Agricultural University, Nanjing, 210095, China. E-mail: ycl@njau.edu.cn. Telephone: +86-25-84395207.

Table 1. Crystallographic data of compound **T1**.....S1

Spectrograms of title compounds **T1-T20**.....S2

FTIR spectrograms of title compounds **T1-T20**.....S32

Table 1. Crystallographic data of compound **T1**

|                                         |                                                    |
|-----------------------------------------|----------------------------------------------------|
| Chemical formula                        | C <sub>19</sub> H <sub>16</sub> ClN <sub>5</sub> O |
| Formula weight                          | 365.82                                             |
| Temperature[K]                          | 100.00(10)                                         |
| Crystal system                          | Monoclinic                                         |
| Space group                             | P21/c                                              |
| <i>a</i> [Å]                            | 9.2973(4)                                          |
| <i>b</i> [Å]                            | 16.7097(7)                                         |
| <i>c</i> [Å]                            | 11.0503(5)                                         |
| $\alpha$ [°]                            | 90                                                 |
| $\beta$ [°]                             | 94.760(4)                                          |
| $\gamma$ [°]                            | 90                                                 |
| <i>V</i> [Å <sup>3</sup> ]              | 1710.80(13)                                        |
| <i>Z</i>                                | 4                                                  |
| $\rho$ (calculated)[g/cm <sup>3</sup> ] | 1.420                                              |
| $\mu$ [mm <sup>-1</sup> ]               | 0.242                                              |
| <i>F</i> (000)                          | 760                                                |

|                                               |                                                                 |
|-----------------------------------------------|-----------------------------------------------------------------|
| Crystal size [mm <sup>3</sup> ]               | 0.11 × 0.12 × 0.13                                              |
| Colour, shape                                 | Yellow, block                                                   |
| Radiation [Å]                                 | MoKα (λ = 0.71073)                                              |
| Theta Min-Max [°]                             | 2.2, 26.4                                                       |
| <i>h, k, l</i>                                | -8 ≤ <i>h</i> ≤ 11, -20 ≤ <i>k</i> ≤ 17, -13 ≤ <i>l</i> ≤ 12    |
| Reflections collected                         | 11996                                                           |
| Independent reflections                       | 3489                                                            |
| Data/restraints/parameters                    | 2886/0/237                                                      |
| Goodness-of-fit                               | 1.041                                                           |
| Final R indexes [ <i>I</i> ≥ 2σ ( <i>I</i> )] | <i>R</i> <sub>1</sub> = 0.0428, <i>wR</i> <sub>2</sub> = 0.1021 |
| Final R indexes [all data]                    | <i>R</i> <sub>1</sub> = 0.0538, <i>wR</i> <sub>2</sub> = 0.0949 |
| Min. and Max. Resd. Dens [e Å <sup>-3</sup> ] | -0.28, 0.28                                                     |

<sup>1</sup>H NMR, <sup>13</sup>C NMR and HRMS spectra of the compound **T1**

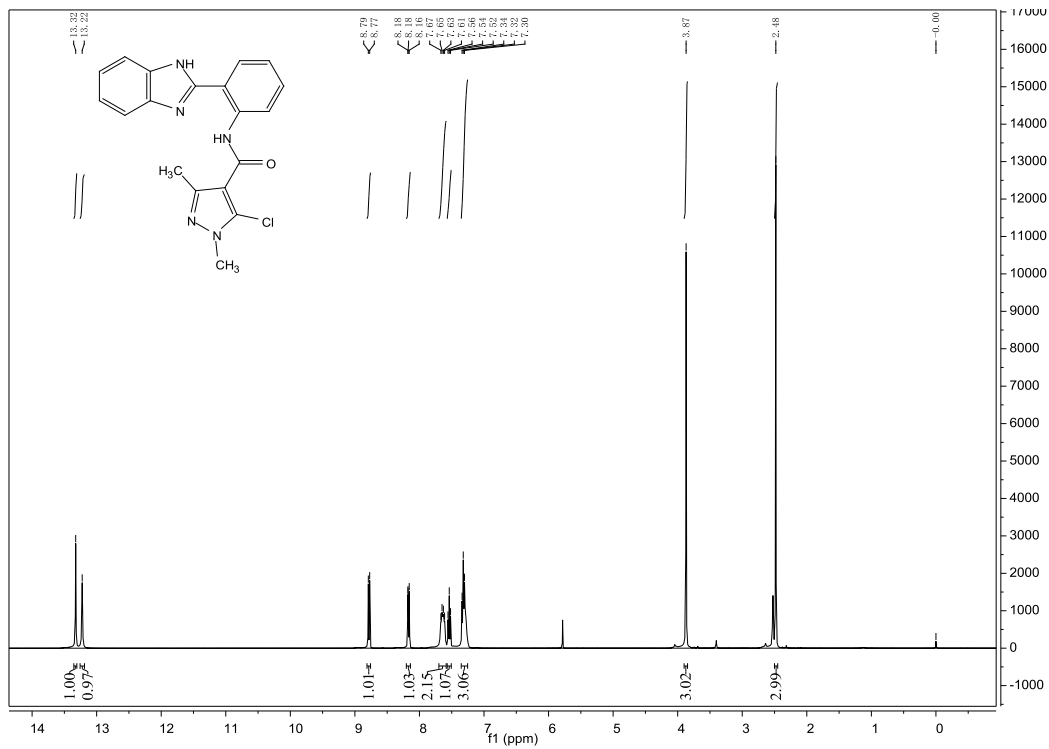

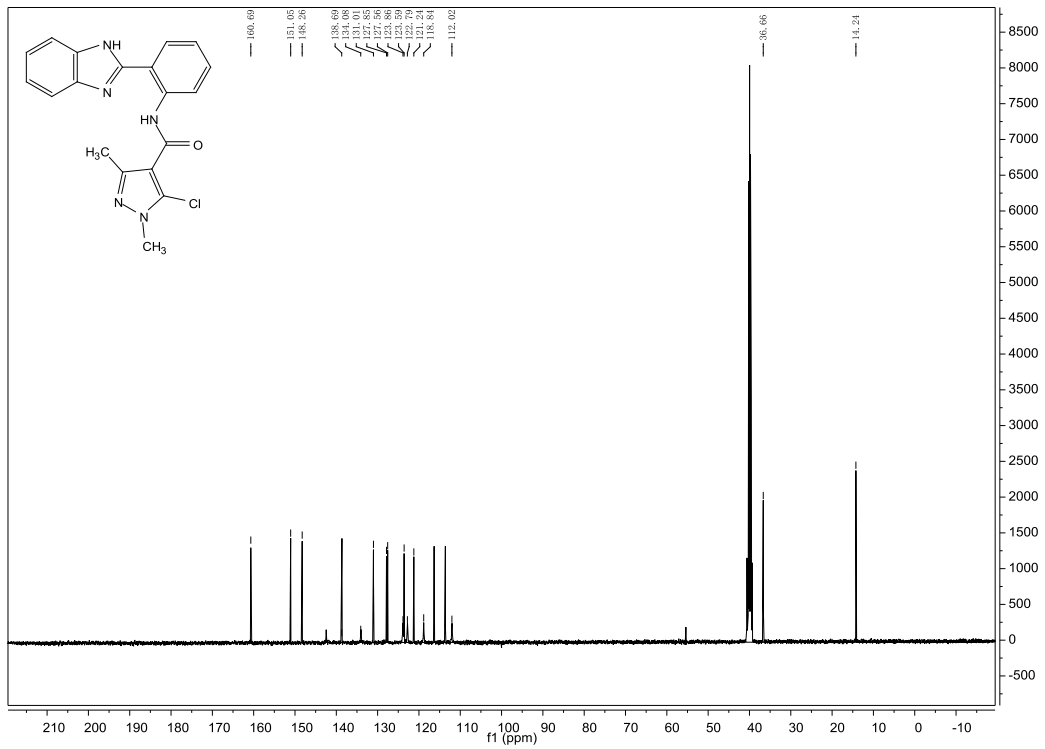

B35 #27 RT: 0.39 AV: 1 NL: 2.89E6  
 T: FTMS (1,1) + p ESI Full ms [100.00-1000.00]

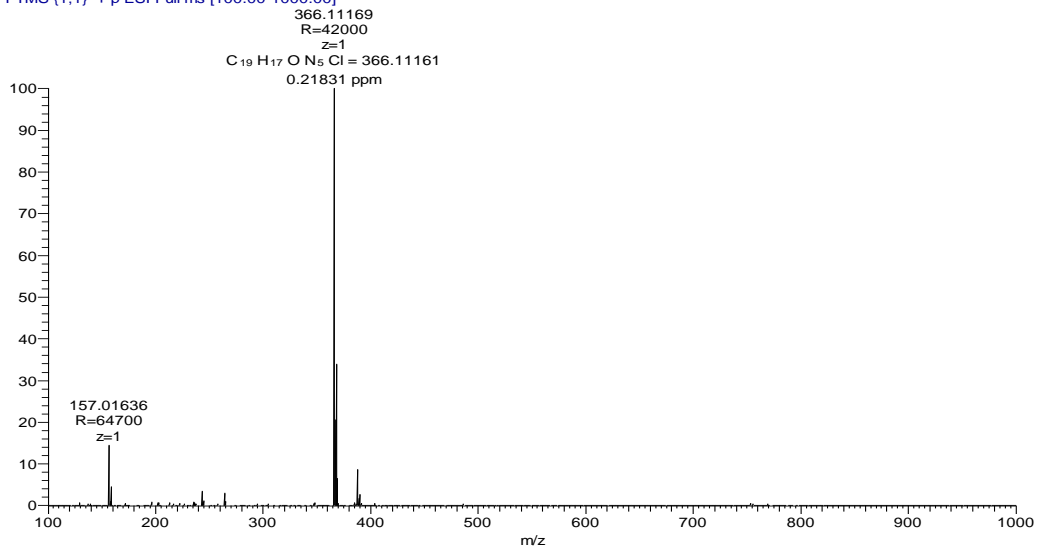

<sup>1</sup>H NMR, <sup>13</sup>C NMR and HRMS spectra of the compound **T2**

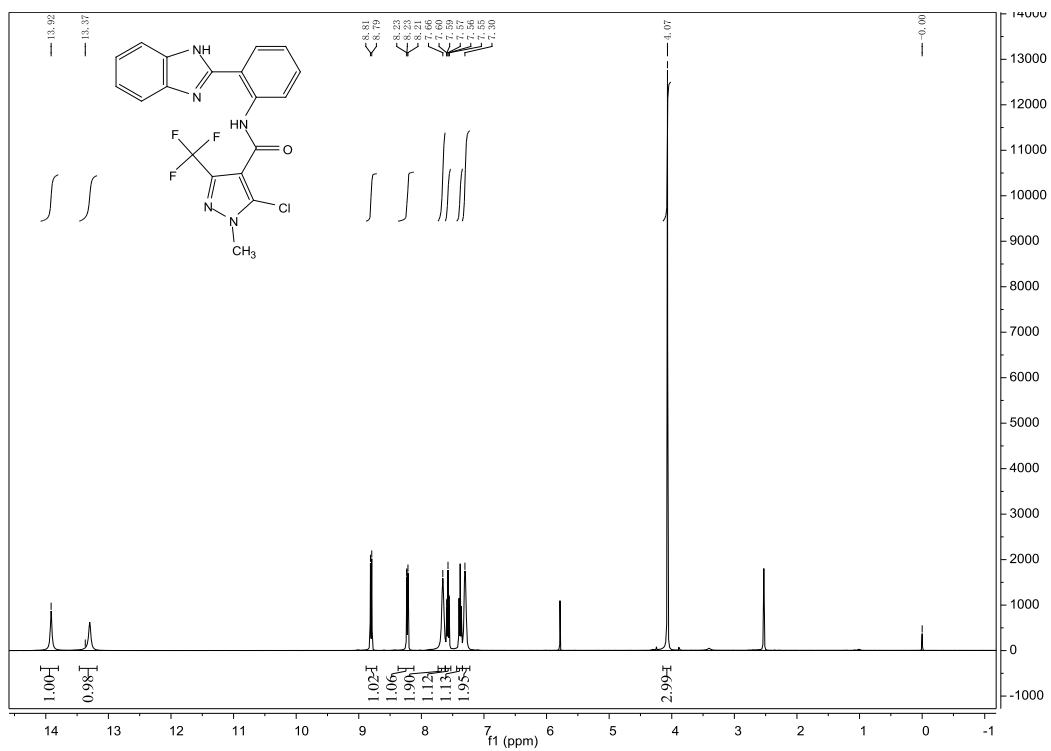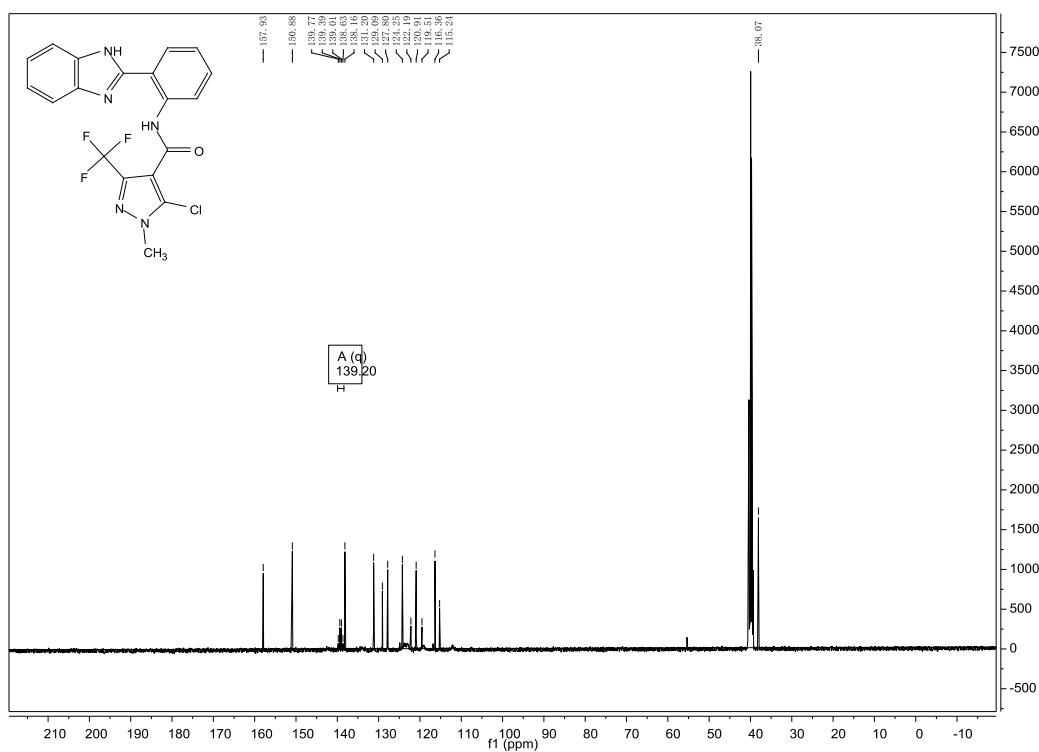



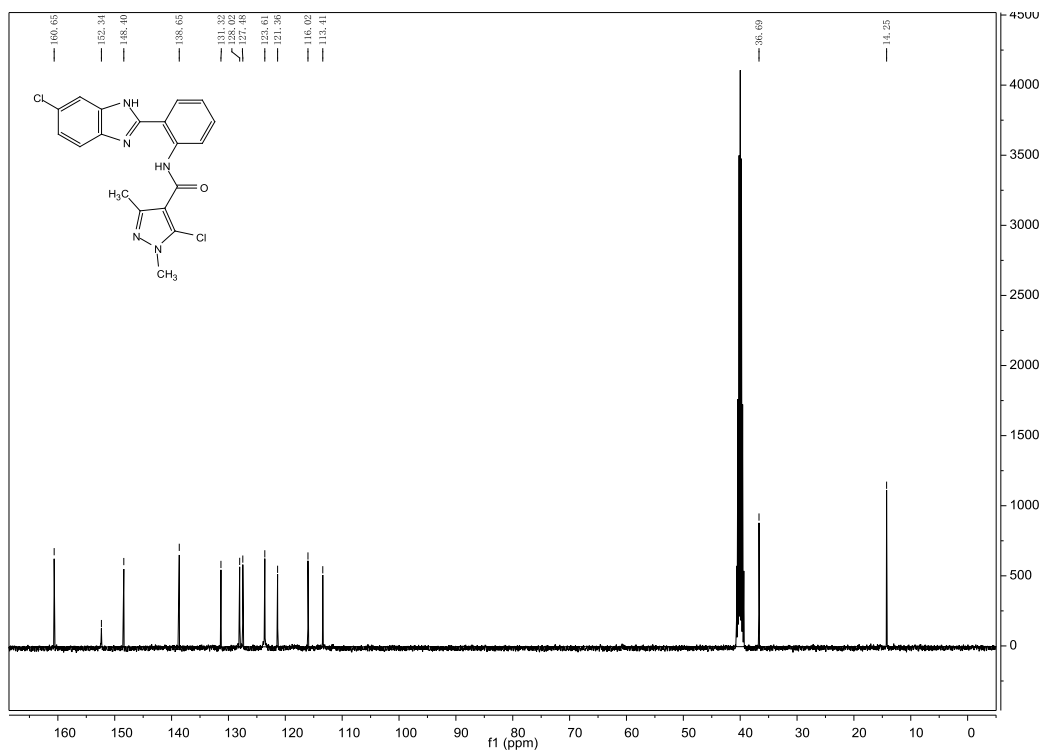

B42 #31 RT: 0.43 AV: 1 NL: 2.57E6  
 T: FTMS (1,1) + p ESI Full ms [100.00-1000.00]

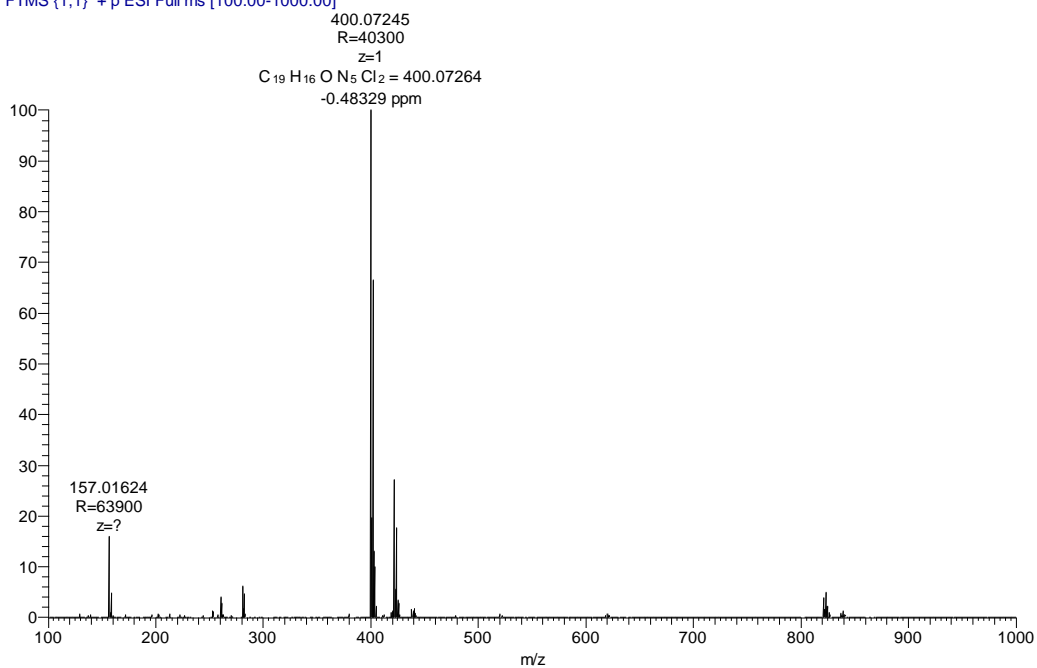

$^1\text{H}$  NMR,  $^{13}\text{C}$  NMR and HRMS spectra of the compound **T4**

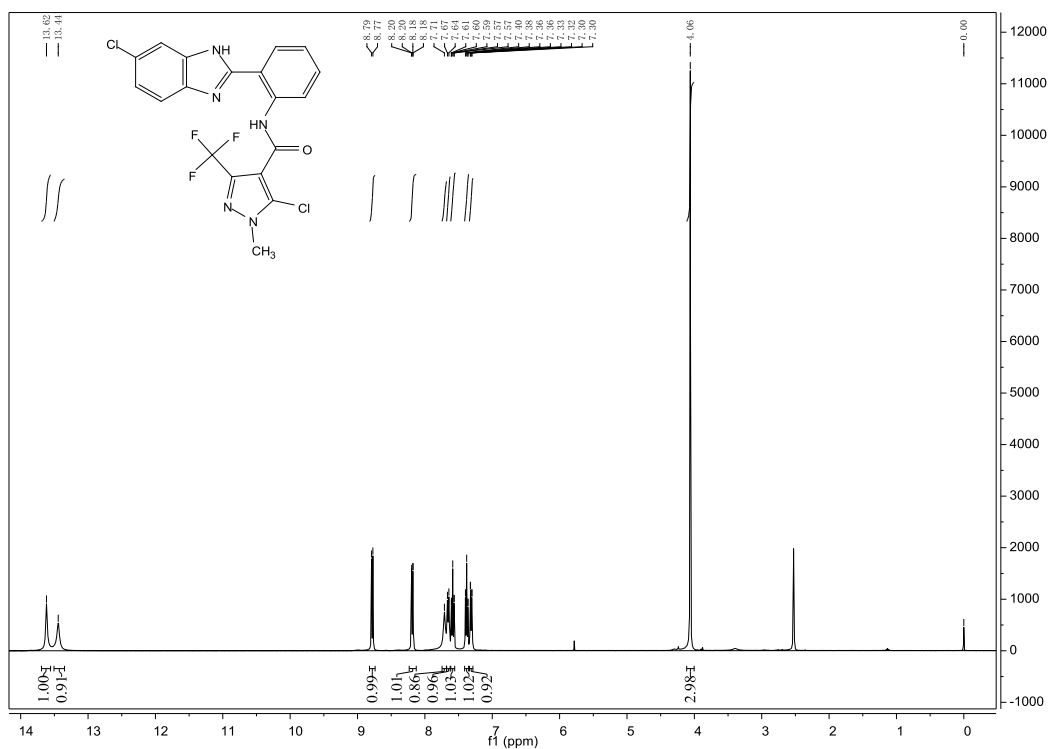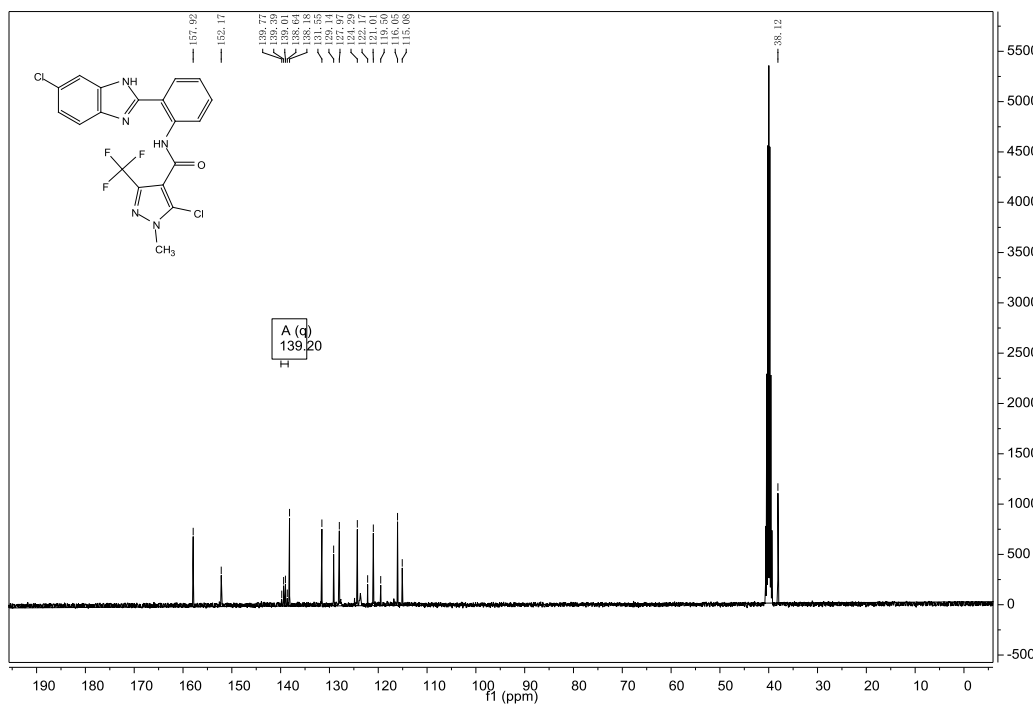

B43 #33 RT: 0.45 AV: 1 NL: 2.42E6  
T: FTMS (1,1) + p ESI Full ms [100.00-1000.00]

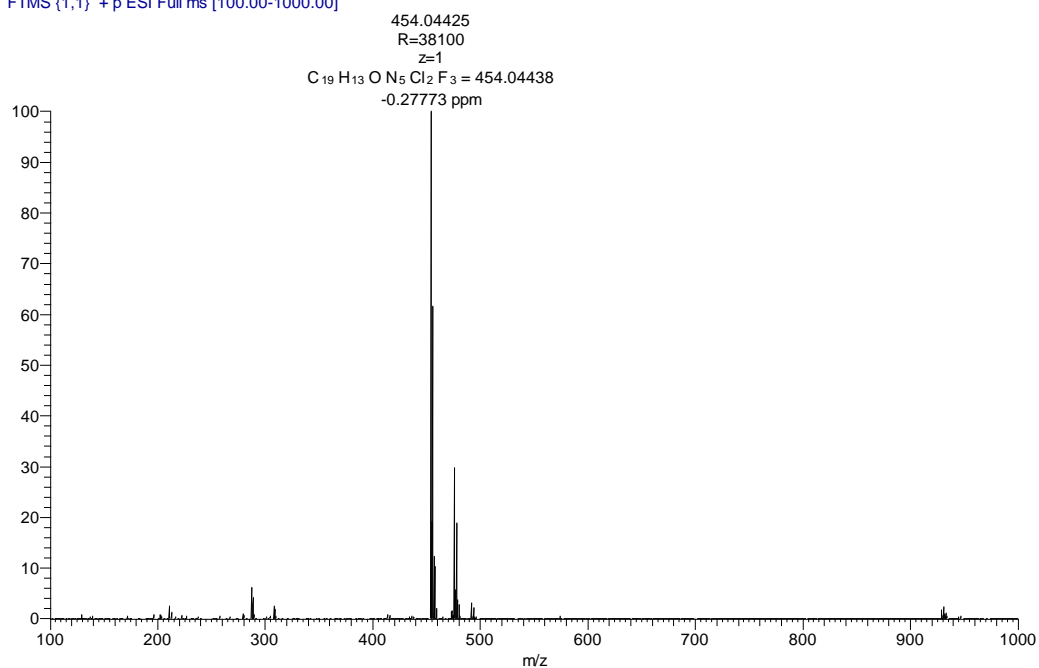

<sup>1</sup>H NMR, <sup>13</sup>C NMR and HRMS spectra of the compound T5

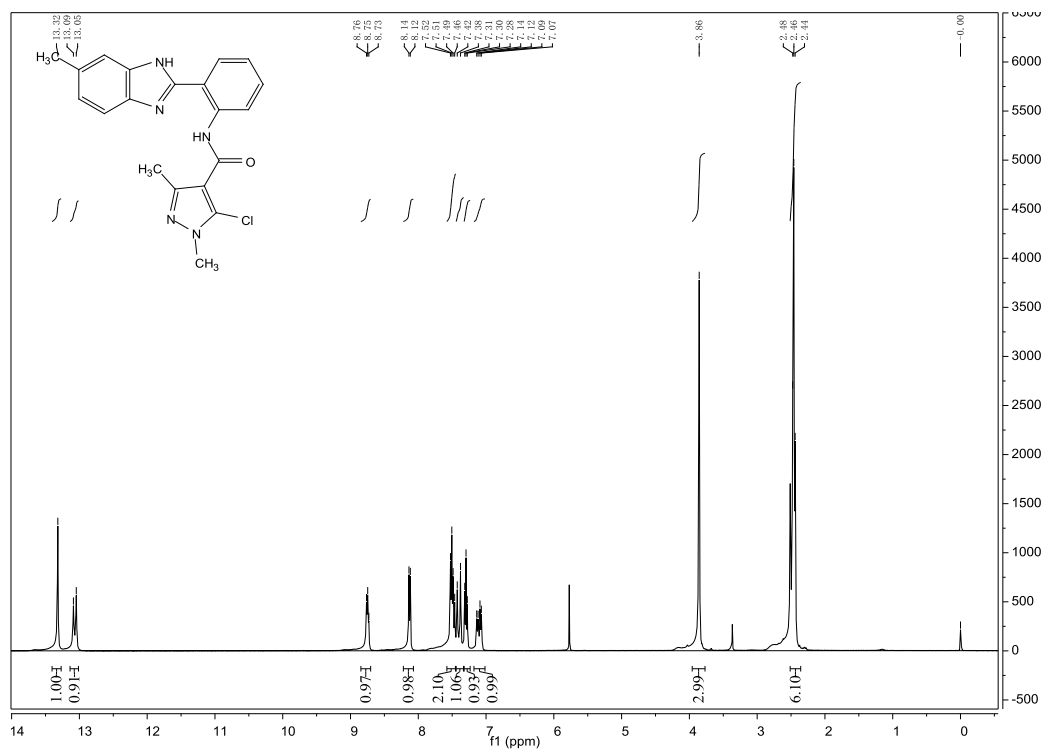



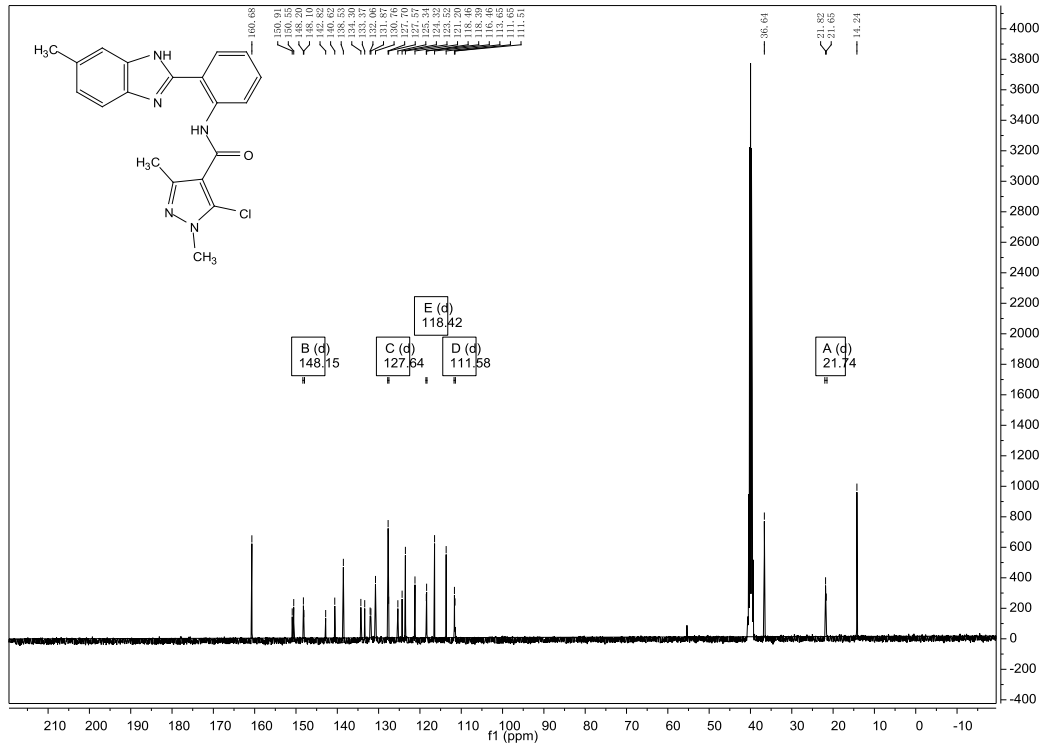

B48 #29 RT: 0.42 AV: 1 NL: 3.11E6  
 T: FTMS {1,1} + p ESI Full ms [100.00-1000.00]

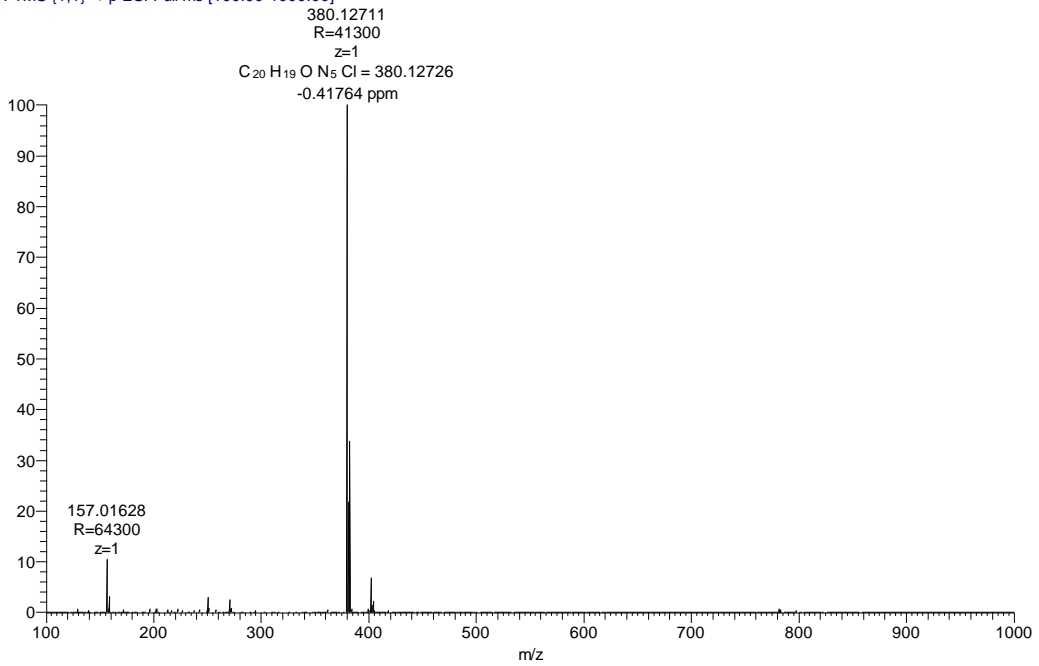

$^1\text{H}$  NMR,  $^{13}\text{C}$  NMR and HRMS spectra of the compound **T6**

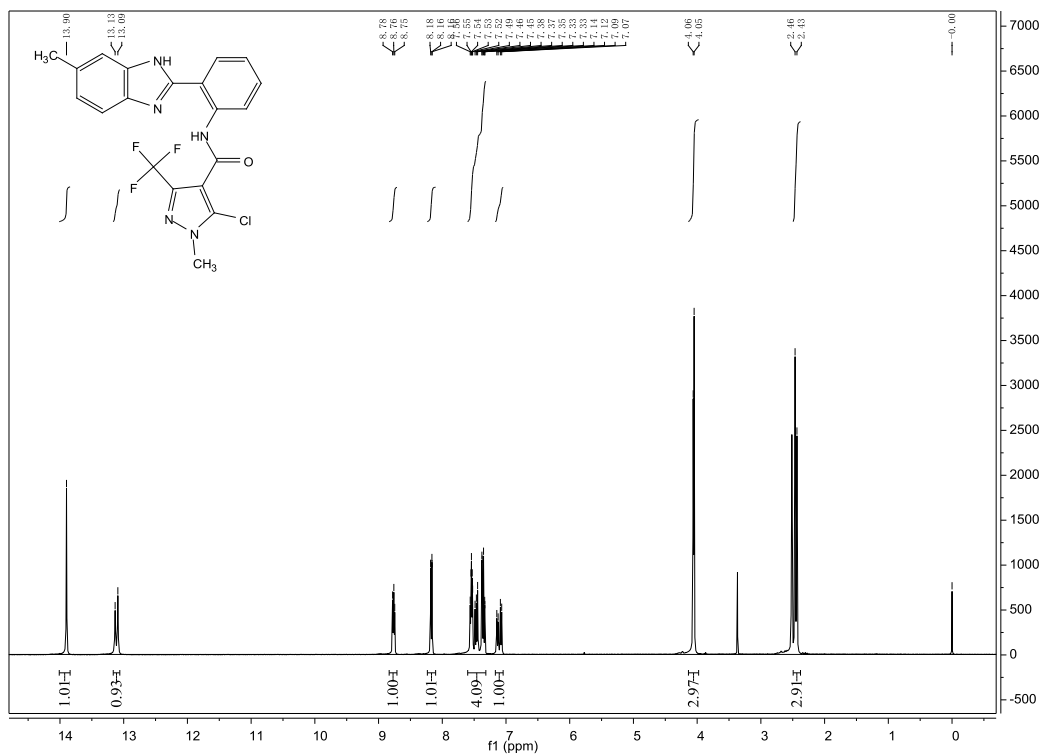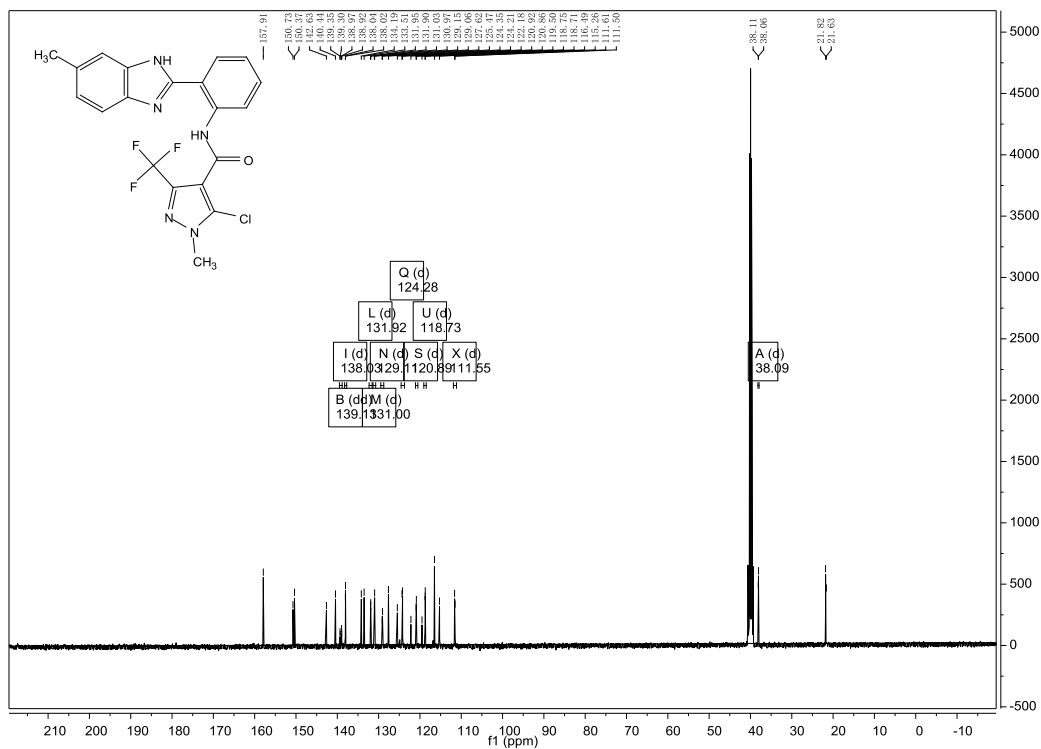

B49 #33-34 RT: 0.44-0.45 AV: 2 NL: 3.37E6  
T: FTMS {1,1} + p ESI Full ms [100.00-1000.00]

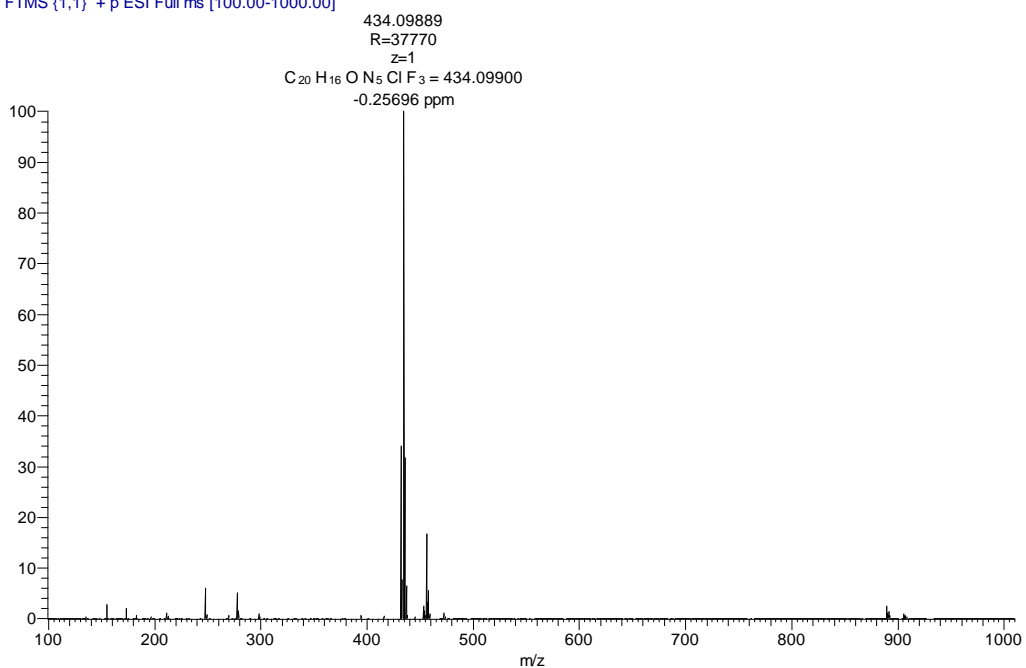

<sup>1</sup>H NMR, <sup>13</sup>C NMR and HRMS spectra of the compound **T7**

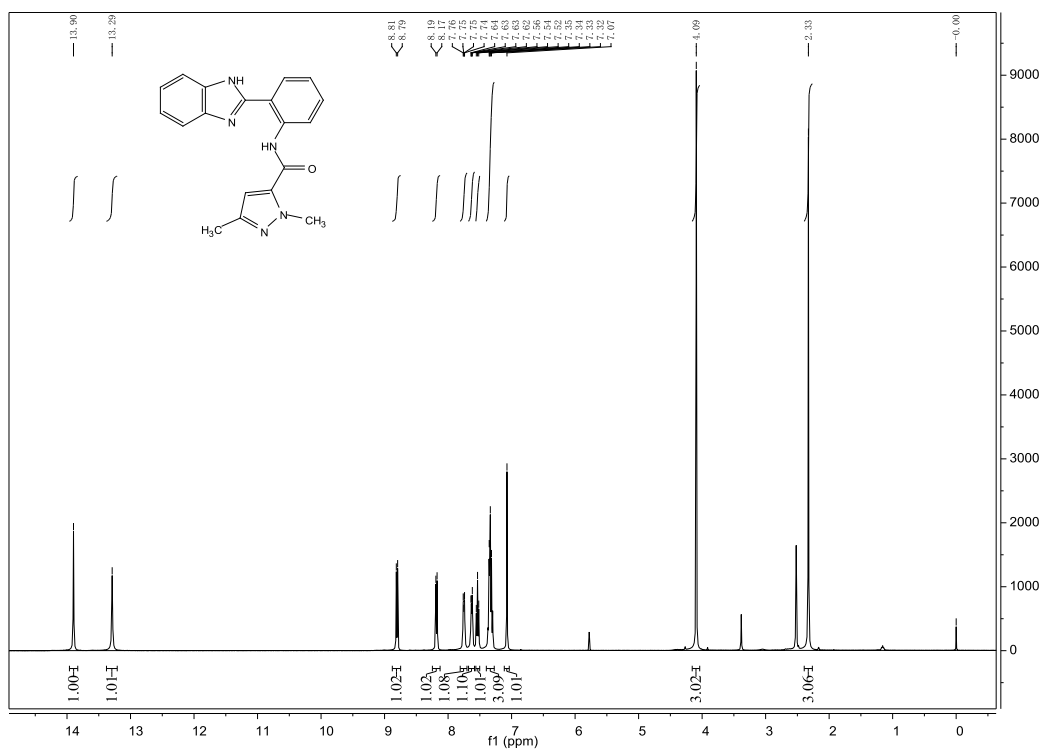

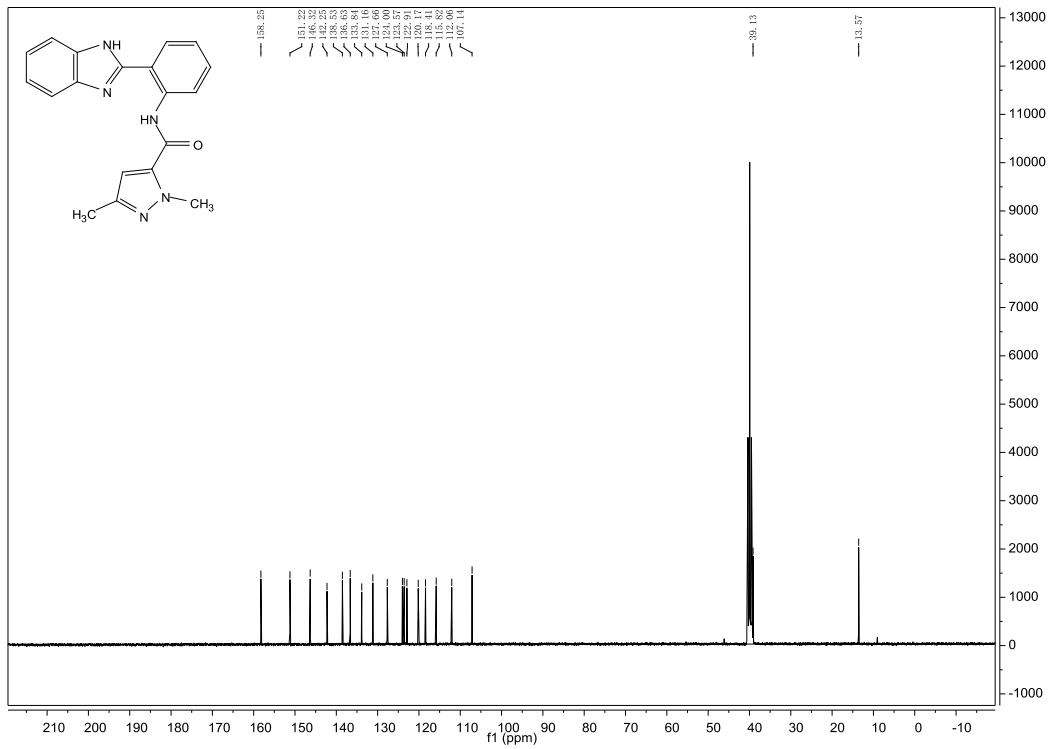

B34 #17 RT: 0.26 AV: 1 NL: 2.71E6  
 T: FTMS (1,1) + p ESI Full ms [100.00-1000.00]

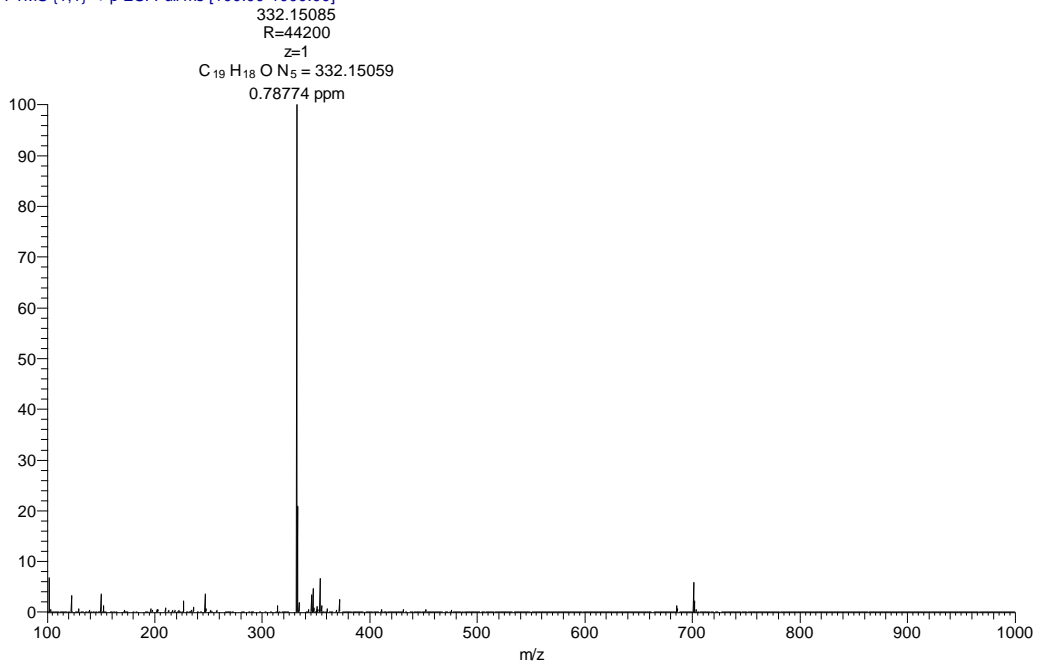

$^1\text{H}$  NMR,  $^{13}\text{C}$  NMR and HRMS spectra of the compound **T8**

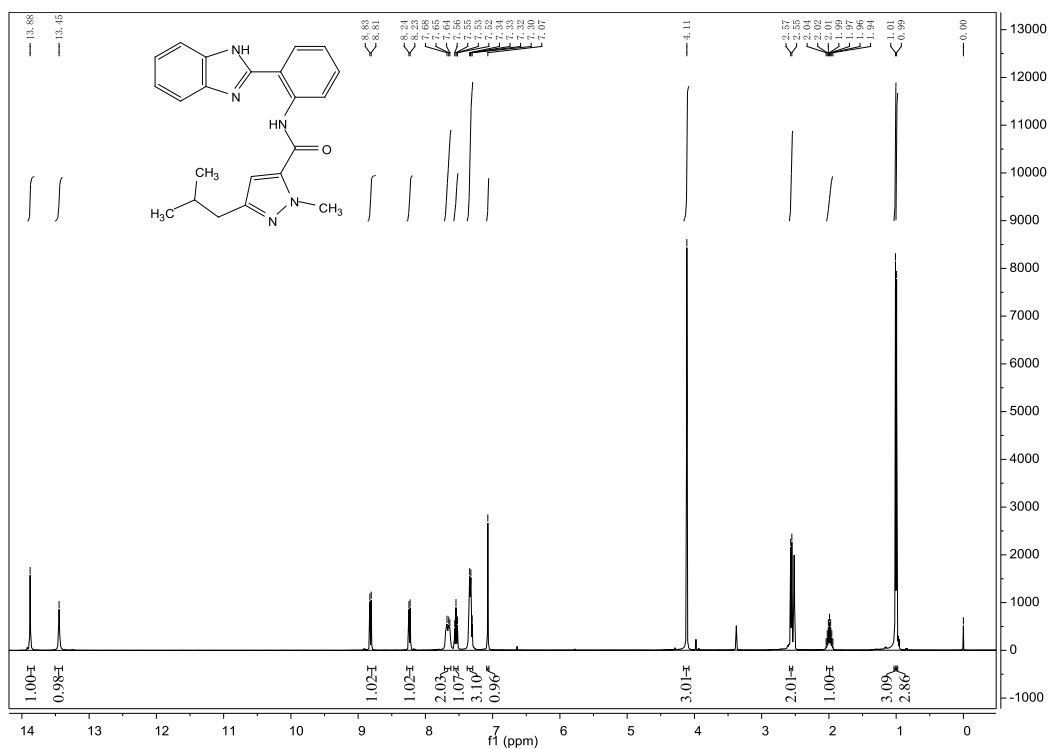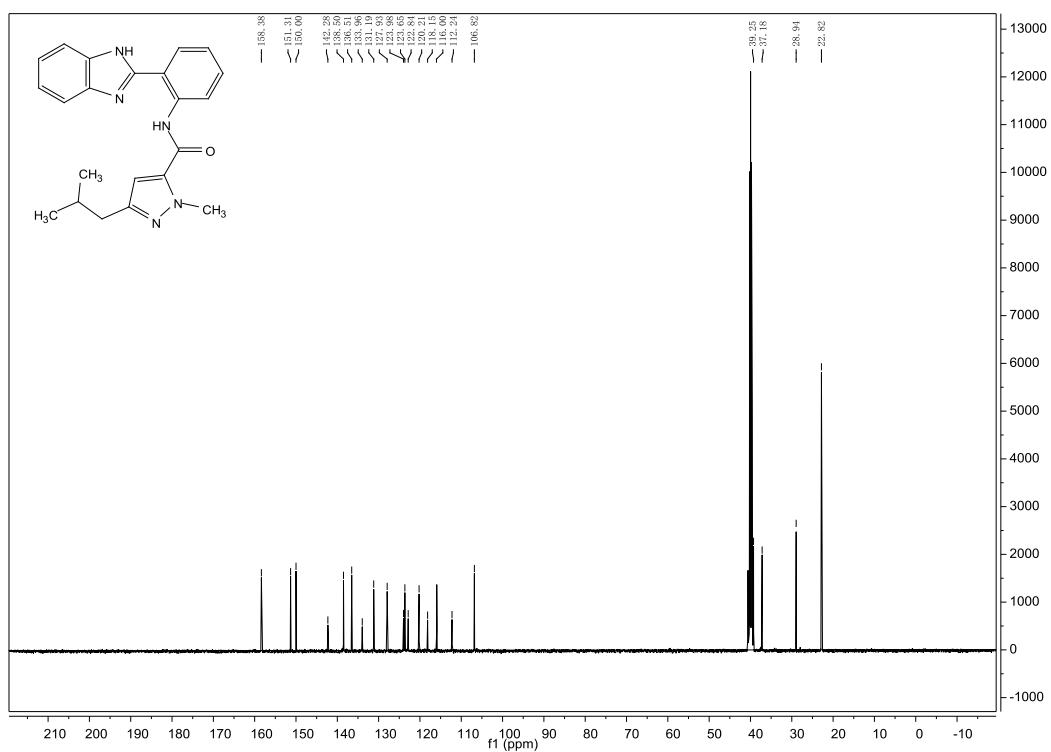

B37 #25 RT: 0.37 AV: 1 NL: 2.14E6  
T: FTMS (1,1) + p ESI Full ms [100.00-1000.00]

374.19775  
R=42500  
z=1  
C<sub>22</sub>H<sub>24</sub>O N<sub>5</sub> = 374.19754  
0.57987 ppm

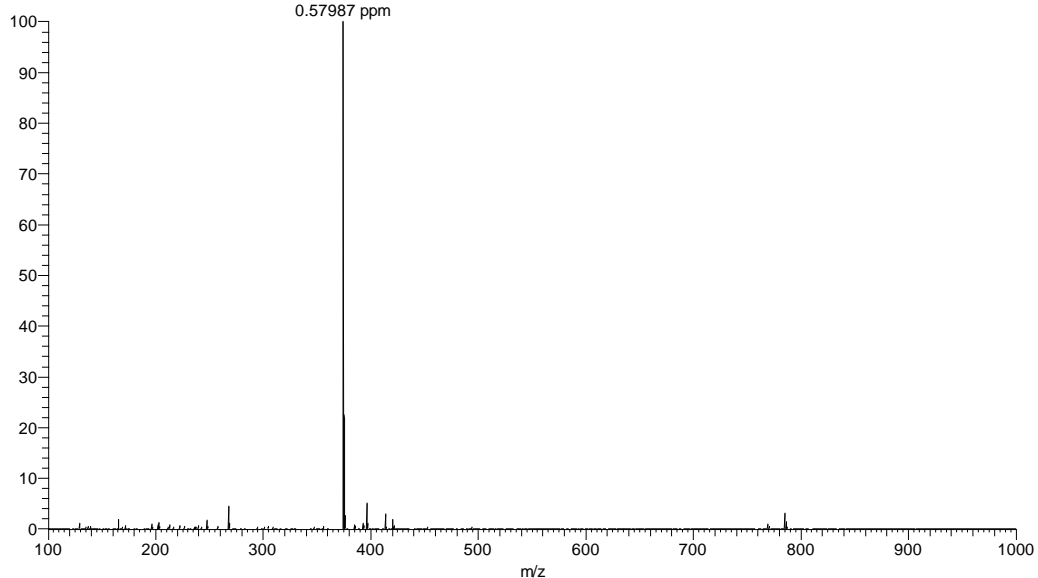

### <sup>1</sup>H NMR, <sup>13</sup>C NMR and HRMS spectra of the compound T9

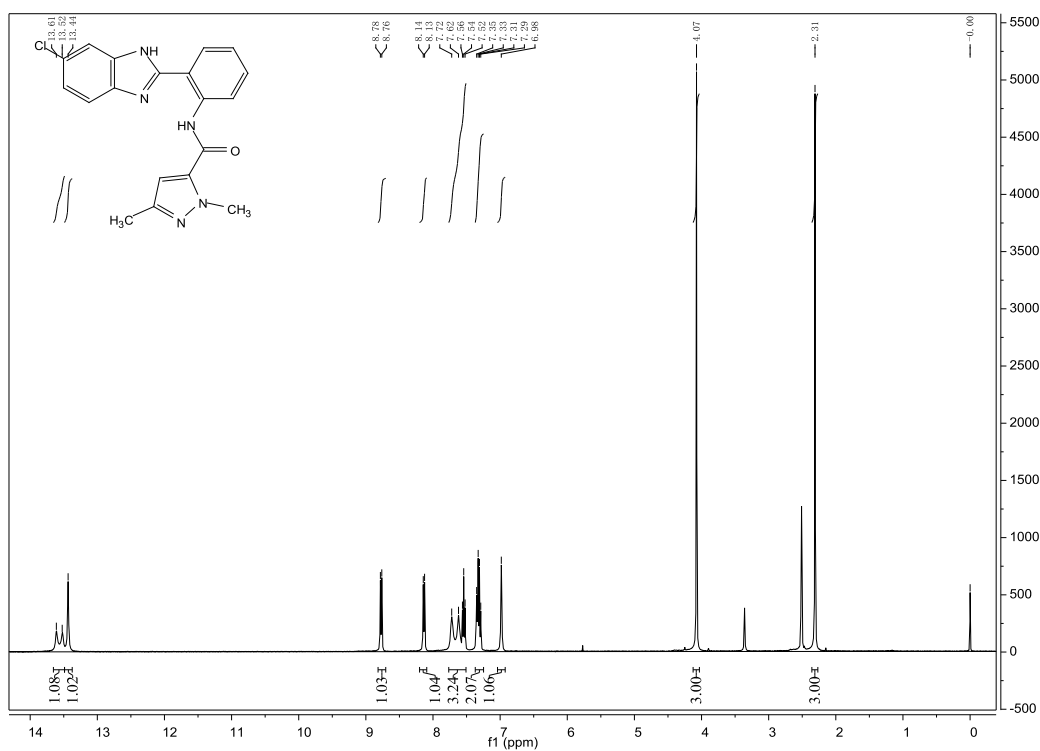

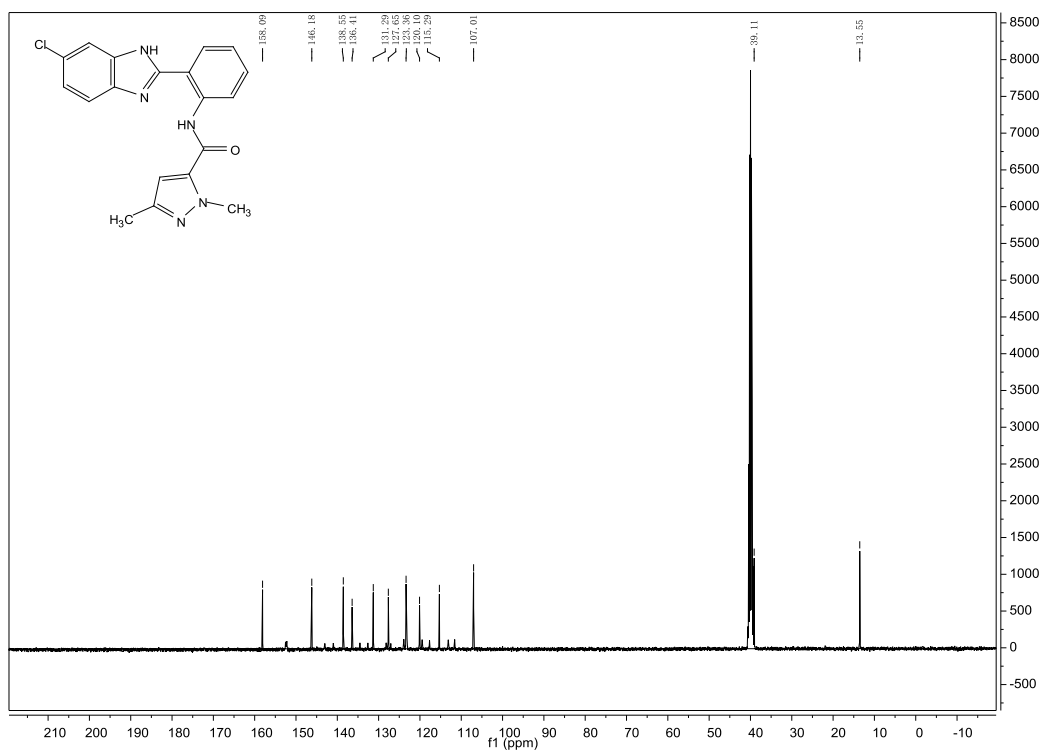

B41 #27 RT: 0.44 AV: 1 NL: 2.96E5  
 T: FTMS (1,1) + p ESI Full ms [100.00-1000.00]

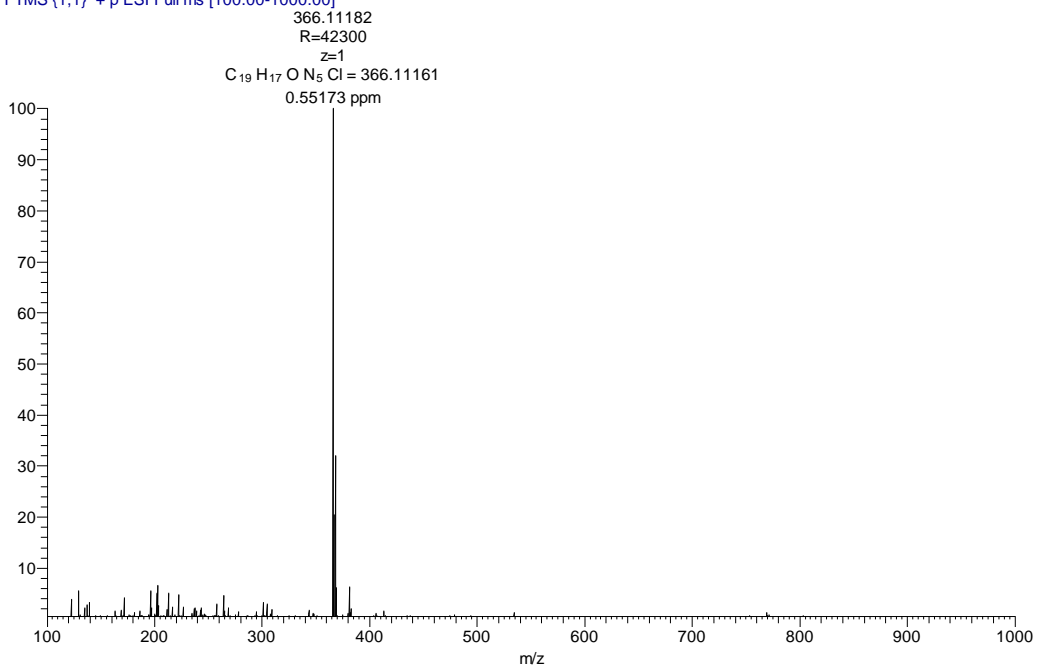





B44 #25 RT: 0.38 AV: 1 NL: 1.07E6  
T: FTMS (1,1) + p ESI Full ms [100.00-1000.00]

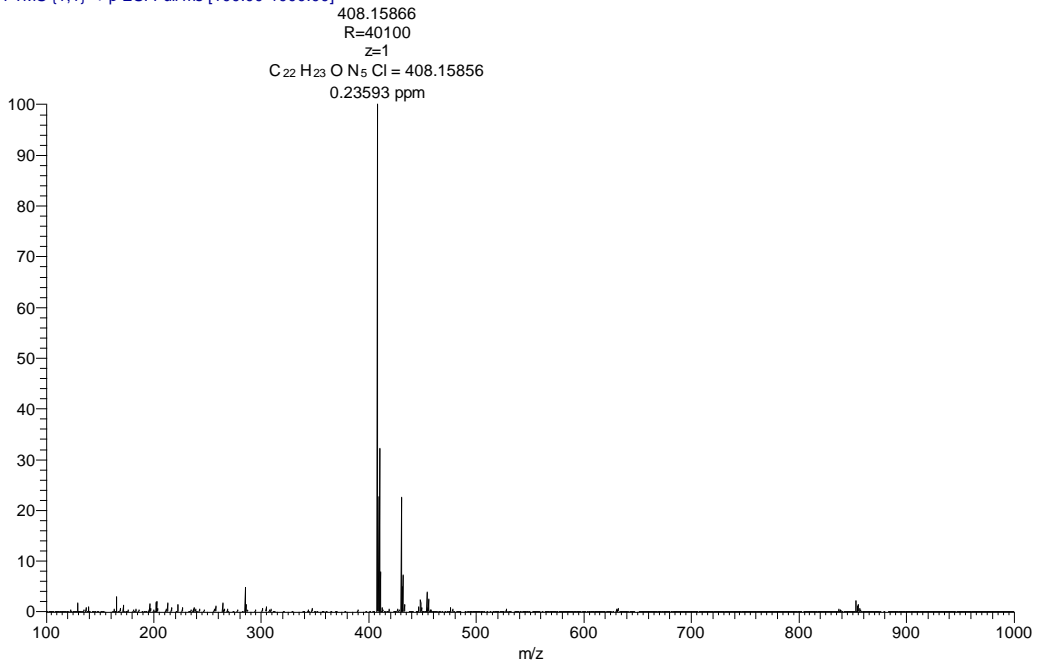

<sup>1</sup>H NMR, <sup>13</sup>C NMR and HRMS spectra of the compound **T11**

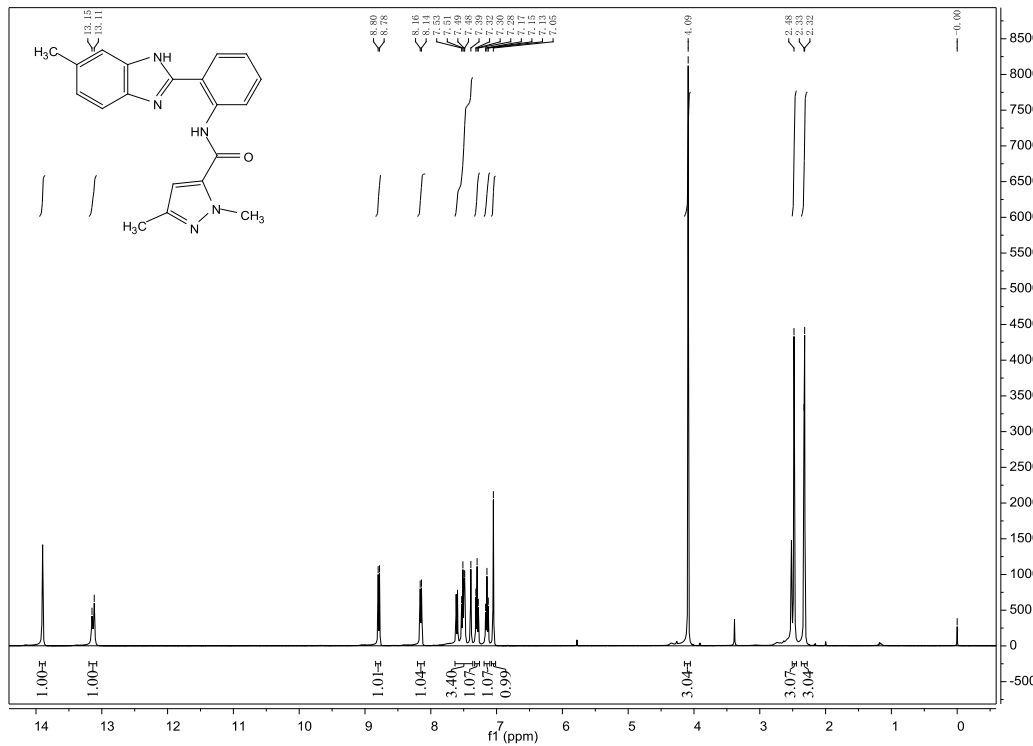

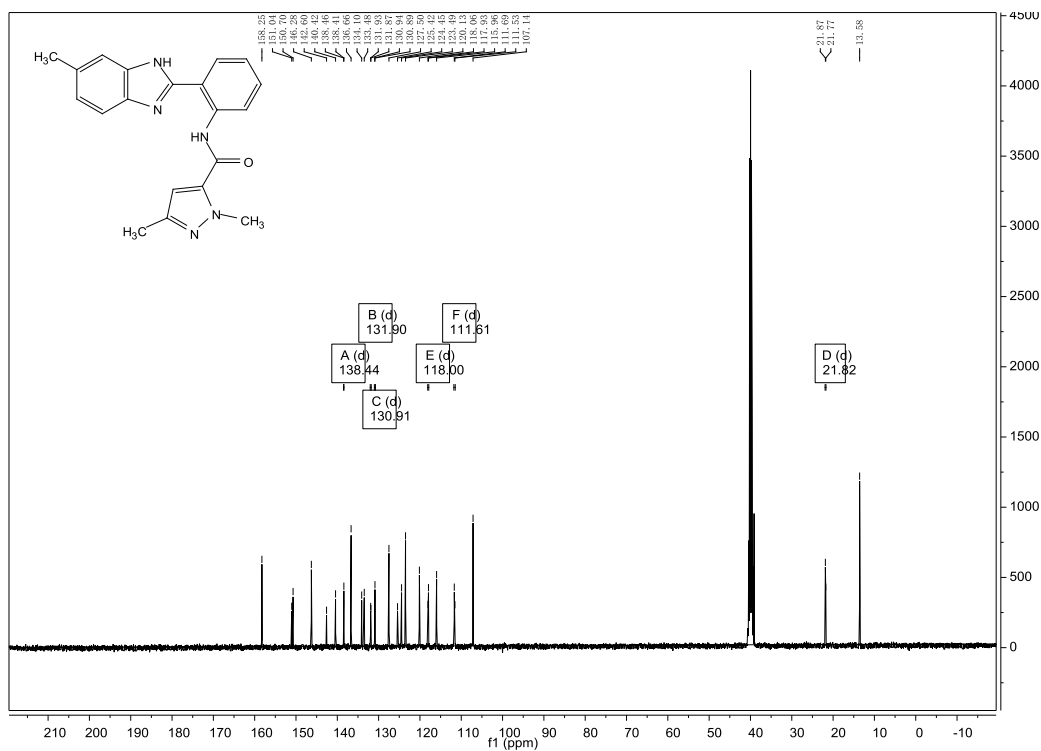

B47 #21 RT: 0.31 AV: 1 NL: 3.33E6

T: FTMS (1,1) + p ESI Full ms [100.00-1000.00]

346.16632

R=43800

z=1

C<sub>20</sub>H<sub>20</sub>O N<sub>5</sub> = 346.16624

0.24266 ppm

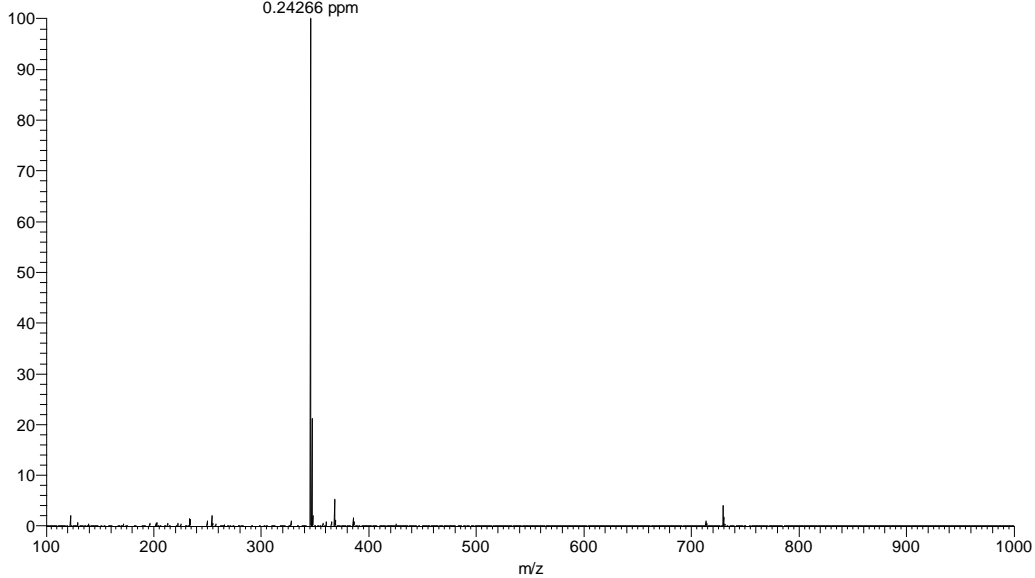

$^1\text{H}$  NMR,  $^{13}\text{C}$  NMR and HRMS spectra of the compound **T12**

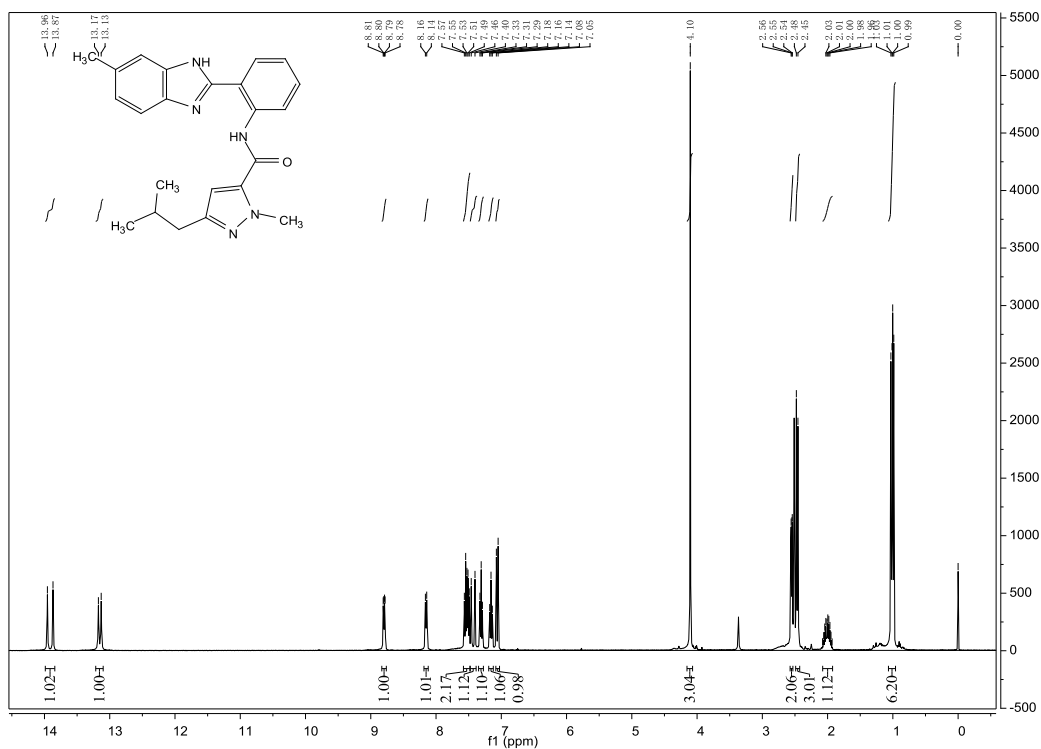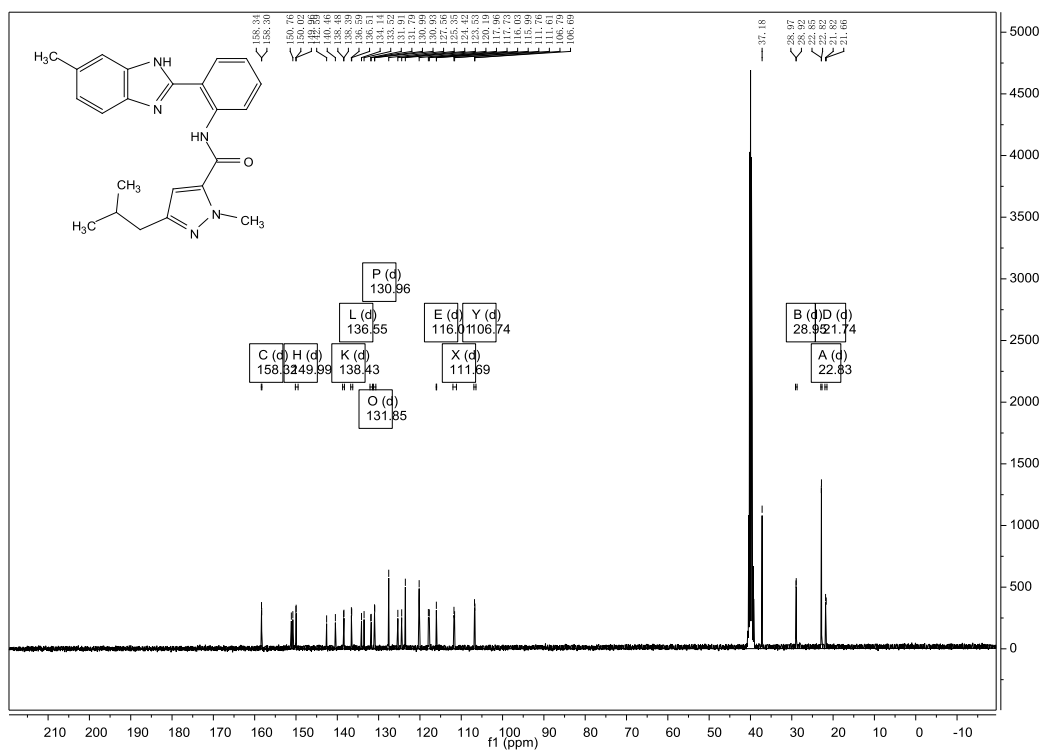

B50 #31 RT: 0.42 AV: 1 NL: 4.84E6  
T: FTMS (1,1) + p ESI Full ms [100.00-1000.00]

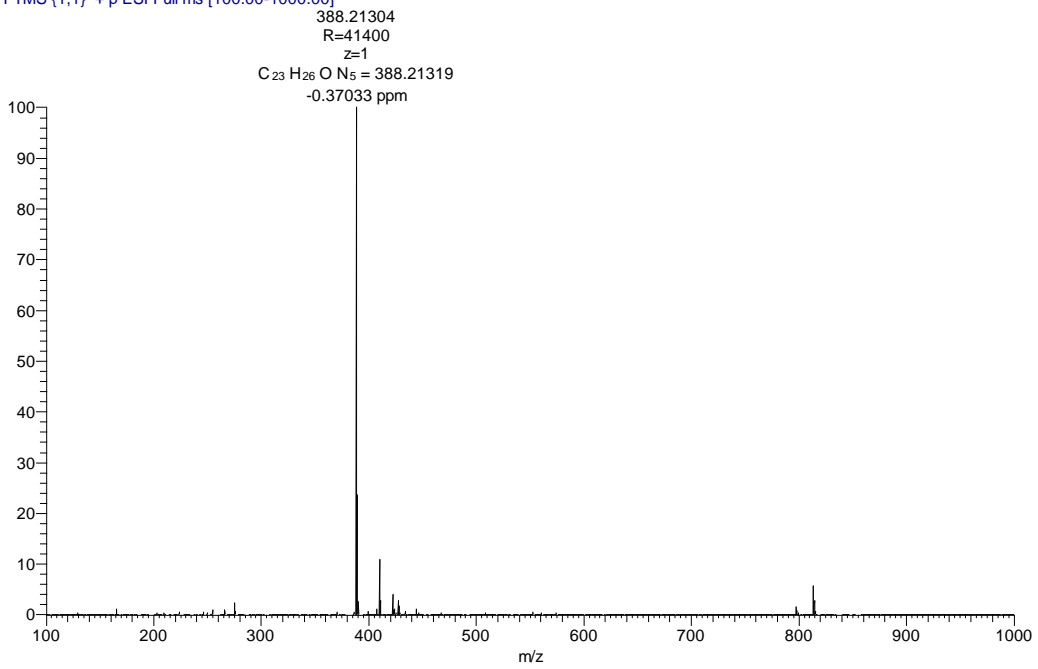

<sup>1</sup>H NMR, <sup>13</sup>C NMR spectra of the compound **T13**

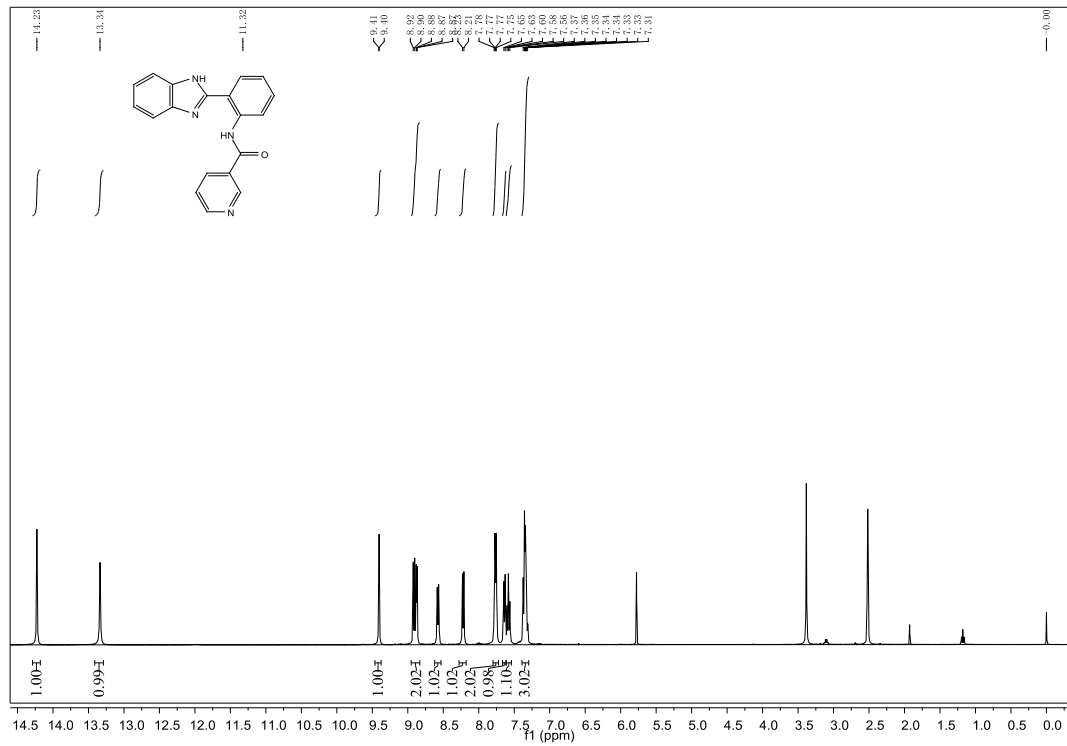

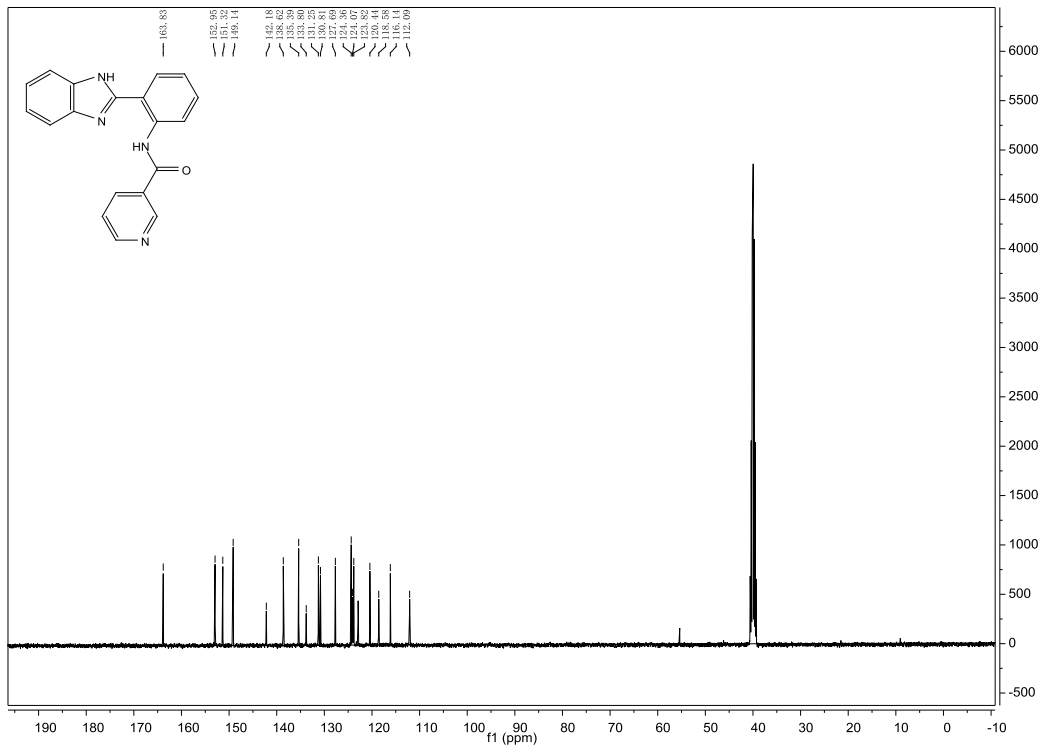

B31 #21 RT: 0.32 AV: 1 NL: 1.98E6  
 T: FTMS (1,1) + p ESI Full ms [100.00-1000.00]

315.12411  
 R=46200  
 z=1  
 C<sub>19</sub>H<sub>15</sub>O<sub>4</sub>N<sub>4</sub> = 315.12404  
 0.24543 ppm

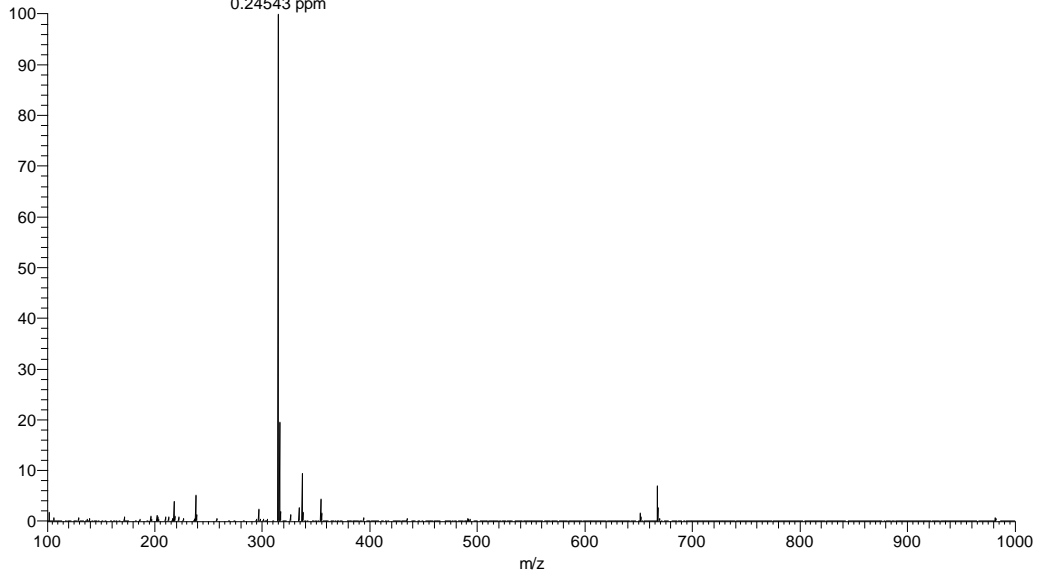

$^1\text{H}$  NMR,  $^{13}\text{C}$  NMR and HRMS spectra of the compound **T14**

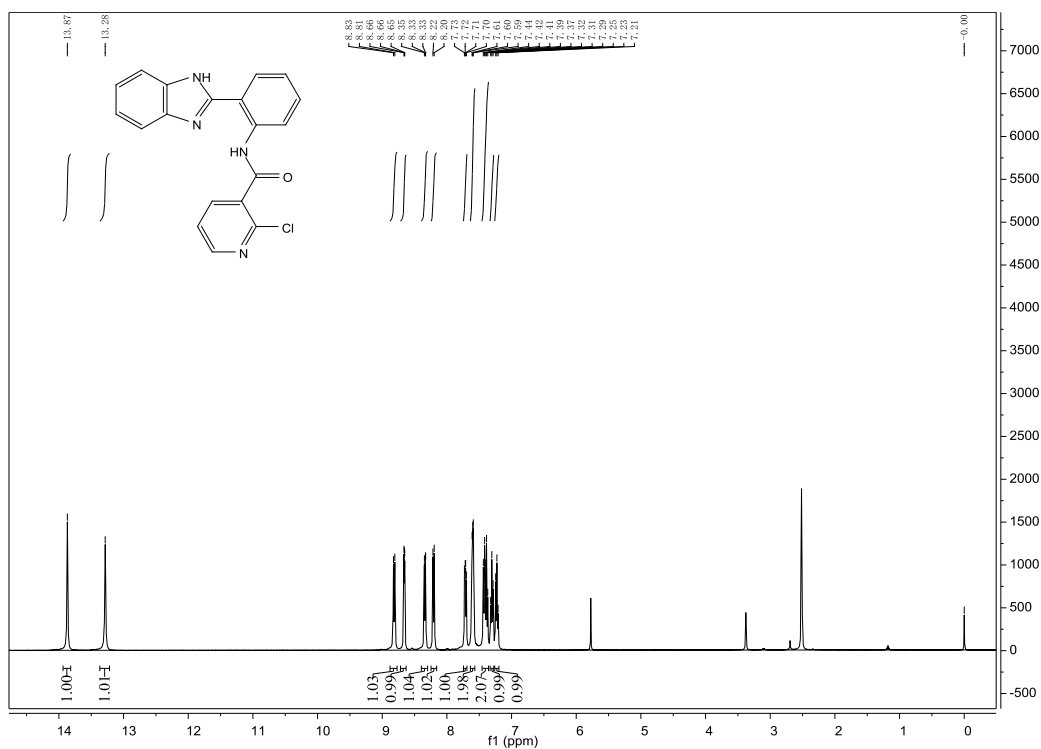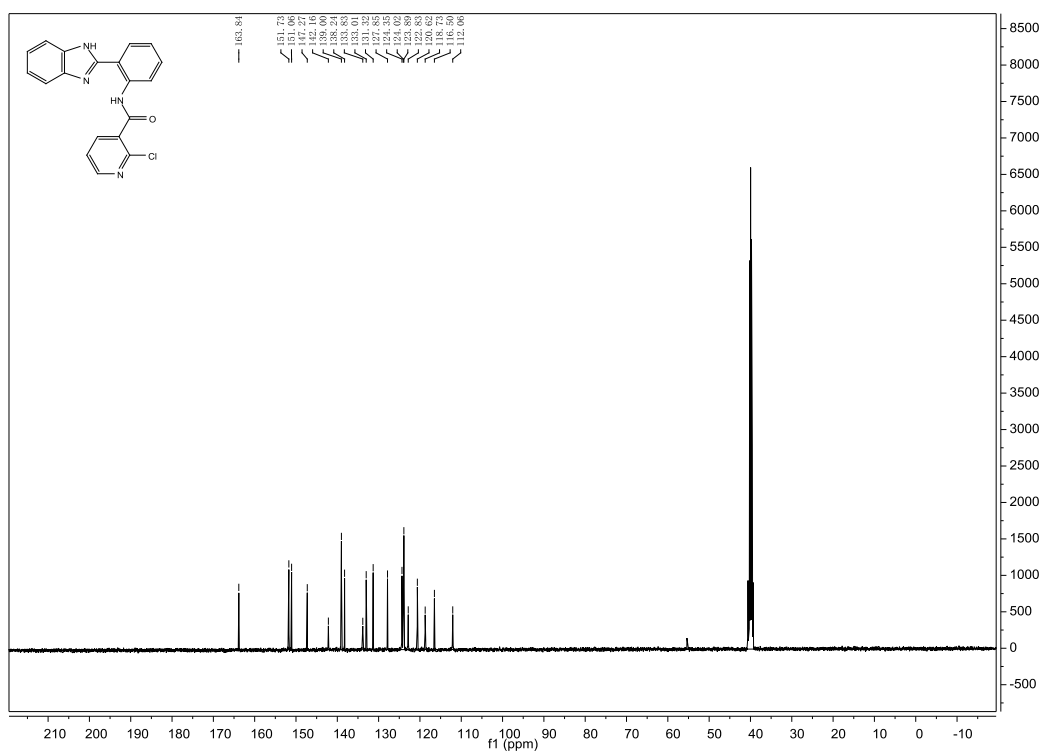

B32 #33 RT: 0.45 AV: 1 NL: 2.81E6  
 T: FTMS (1,1) + p ESI Full ms [100.00-1000.00]  
 349.08511  
 R=44000  
 Z=1  
 C<sub>19</sub> H<sub>14</sub> O N<sub>4</sub> Cl = 349.08507  
 0.13809 ppm

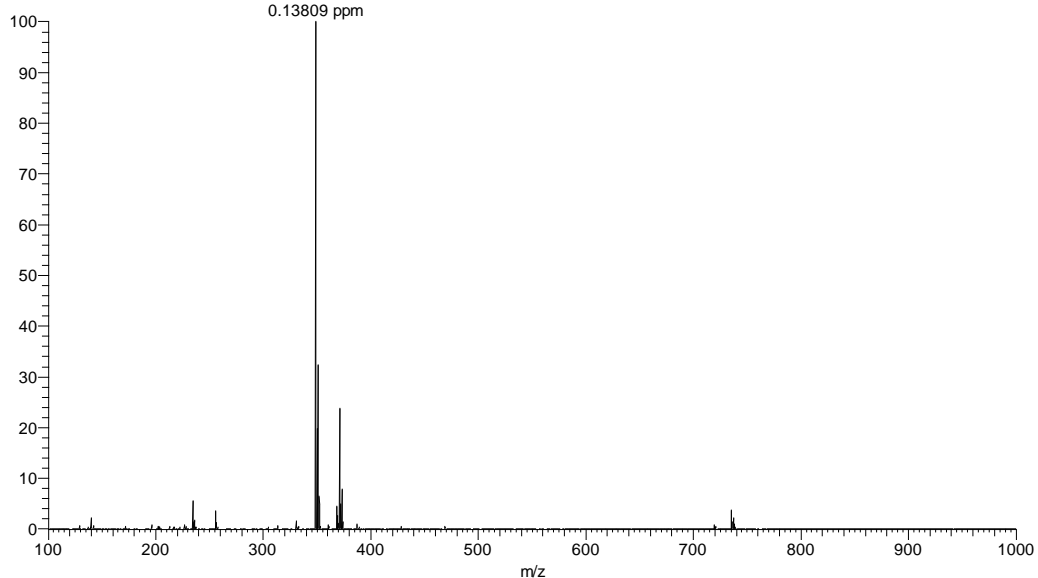

<sup>1</sup>H NMR, <sup>13</sup>C NMR and HRMS spectra of the compound **T15**

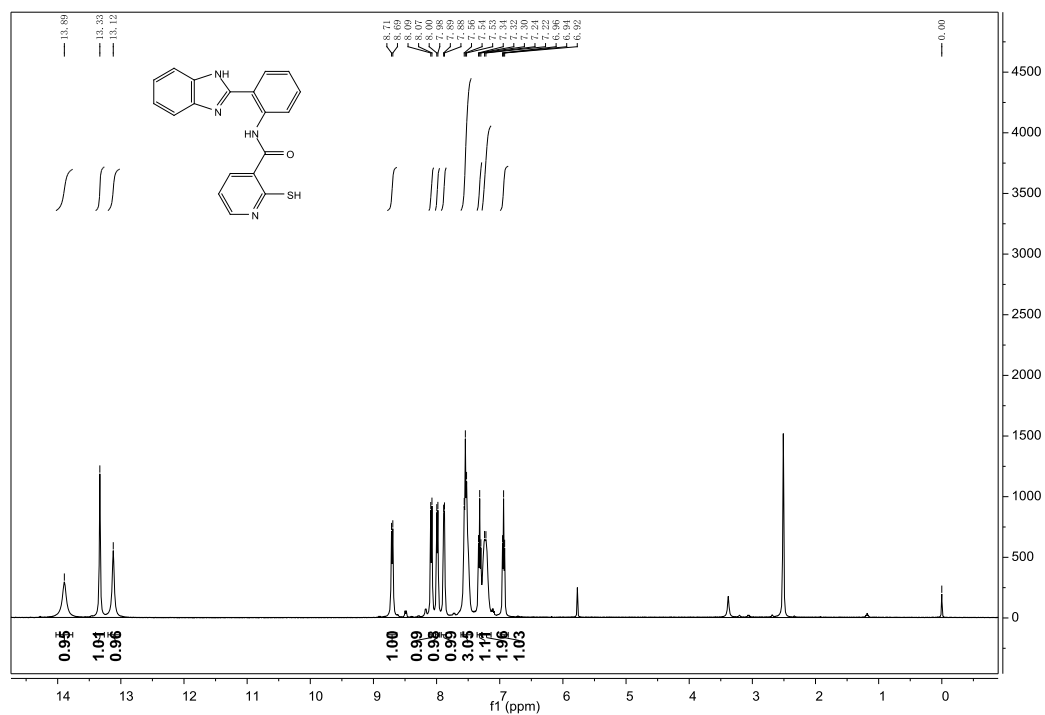

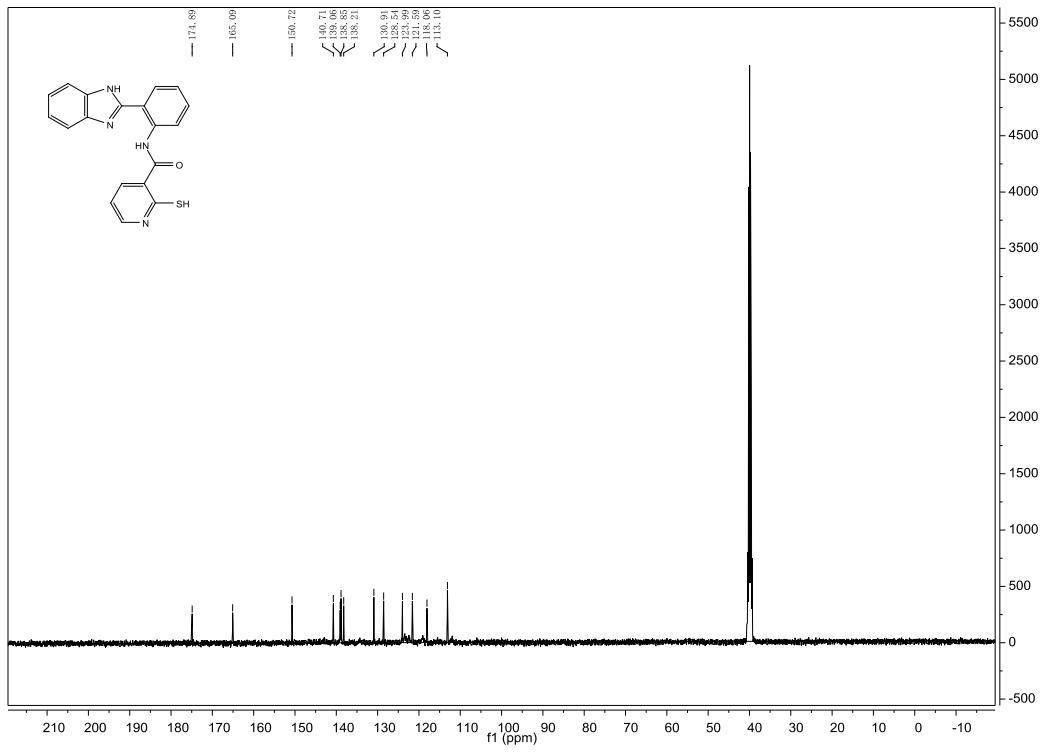

B33 #23 RT: 0.35 AV: 1 NL: 4.43E6

T: FTMS (1,1) + p ESI Full ms [100.00-1000.00]

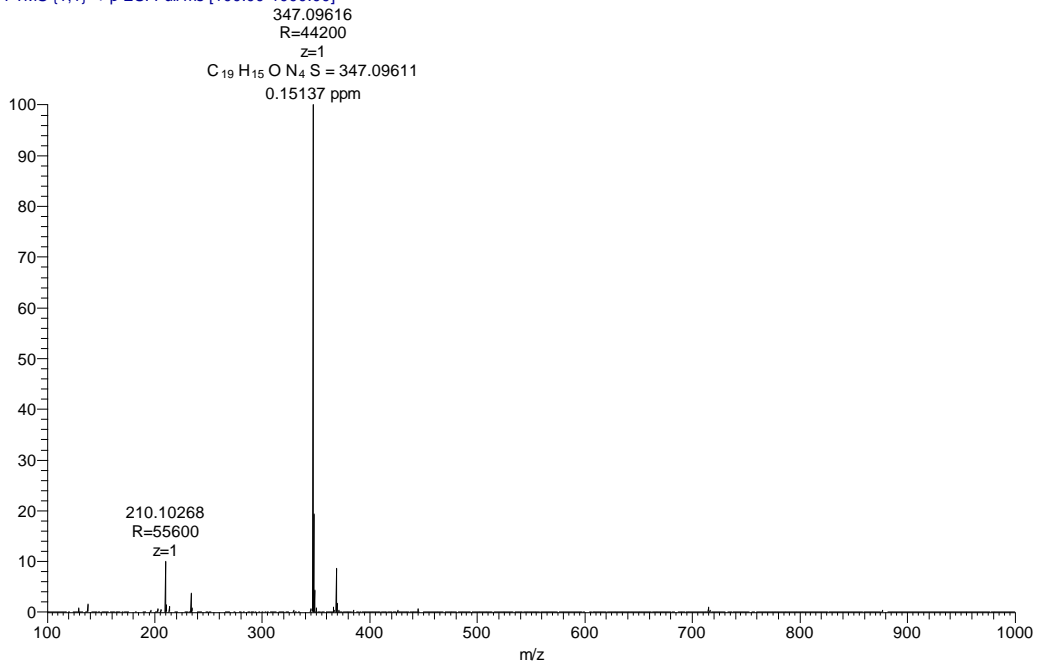



$^1\text{H}$  NMR,  $^{13}\text{C}$  NMR and HRMS spectra of the compound **T16**

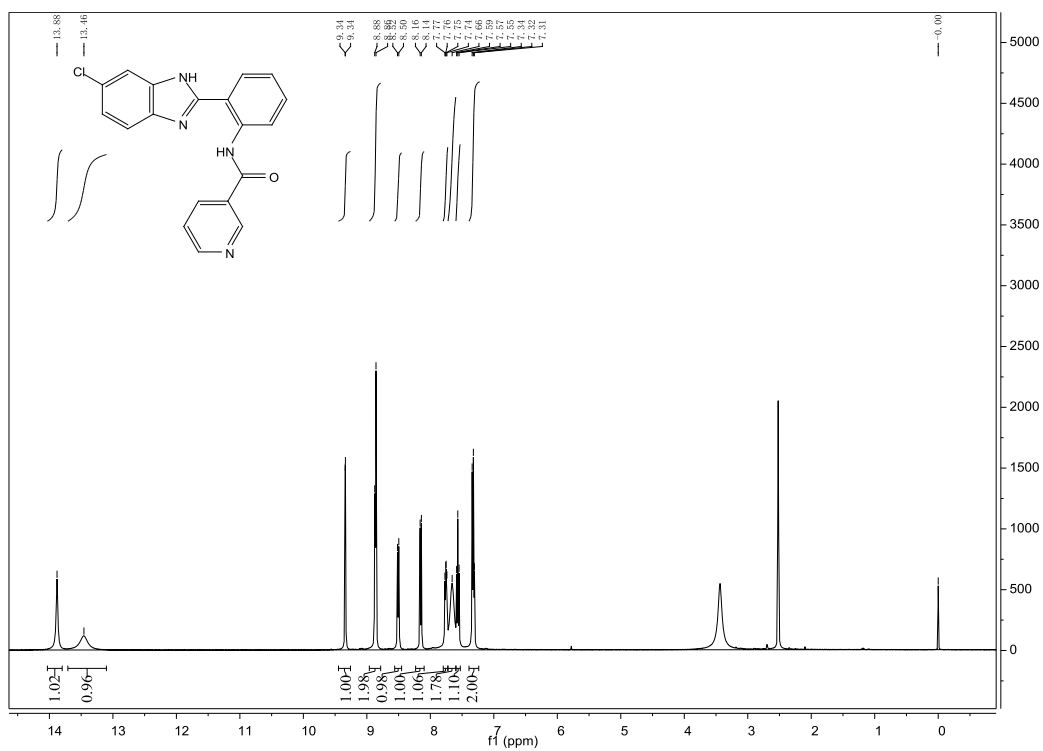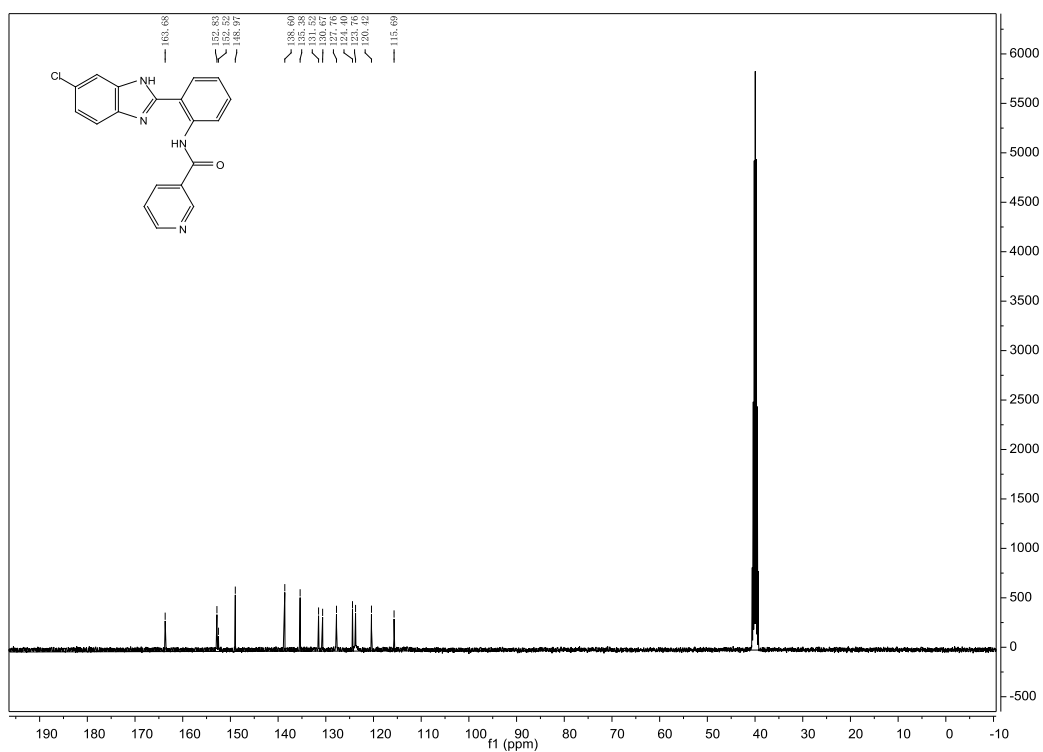

B38 #13 RT: 0.21 AV: 1 NL: 9.26E5  
 T: FTMS (1,1) + p ESI Full ms [100.00-1000.00]  
 349.08527  
 R=43900  
 Z=1  
 C<sub>19</sub> H<sub>14</sub> O N<sub>4</sub> Cl = 349.08507  
 0.57520 ppm

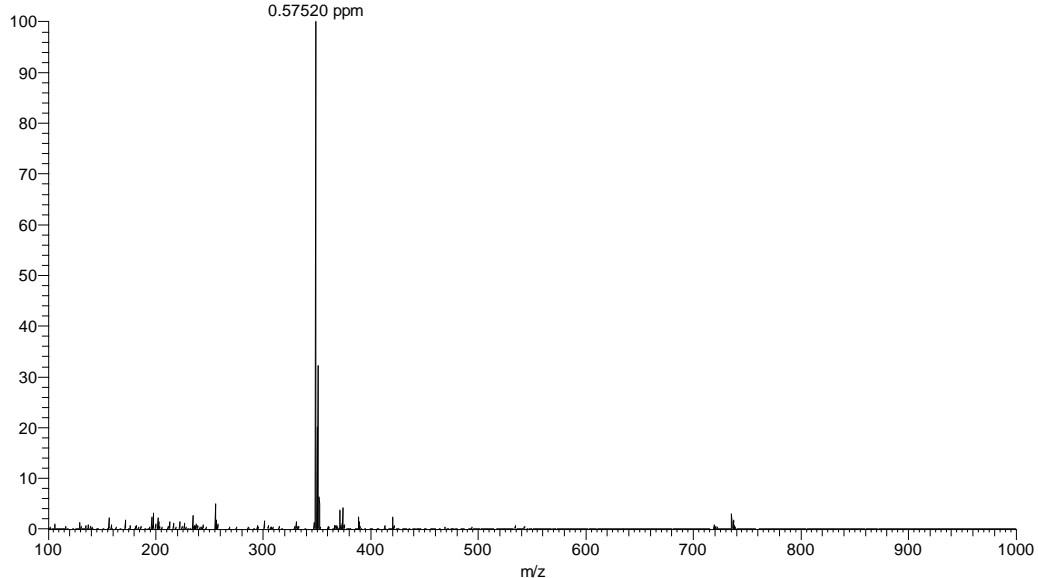

<sup>1</sup>H NMR, <sup>13</sup>C NMR and HRMS spectra of the compound **T17**

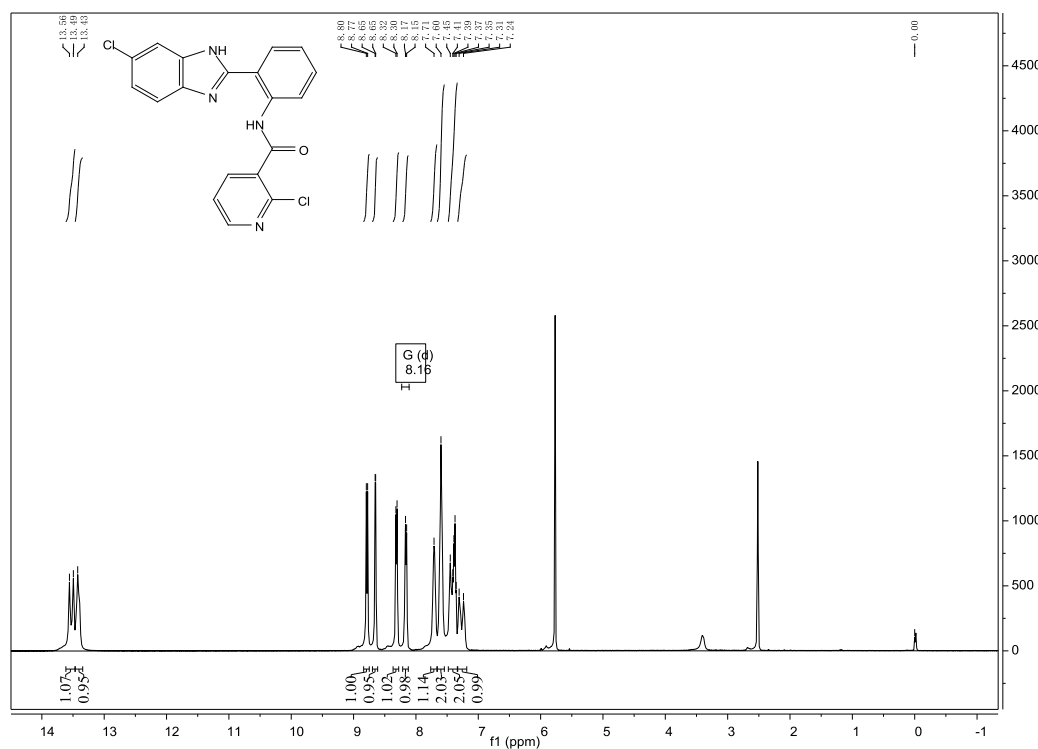

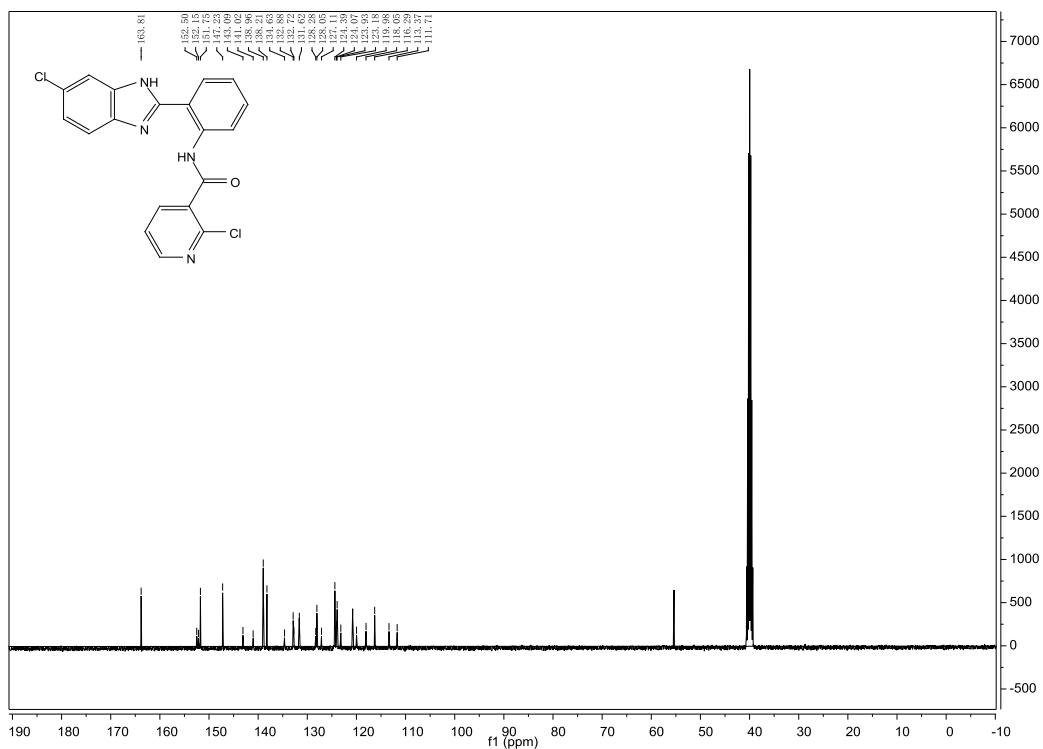

B39 #25 RT: 0.37 AV: 1 NL: 1.28E6  
 T: FTMS (1,1) + p ESI Full ms [100.00-1000.00]

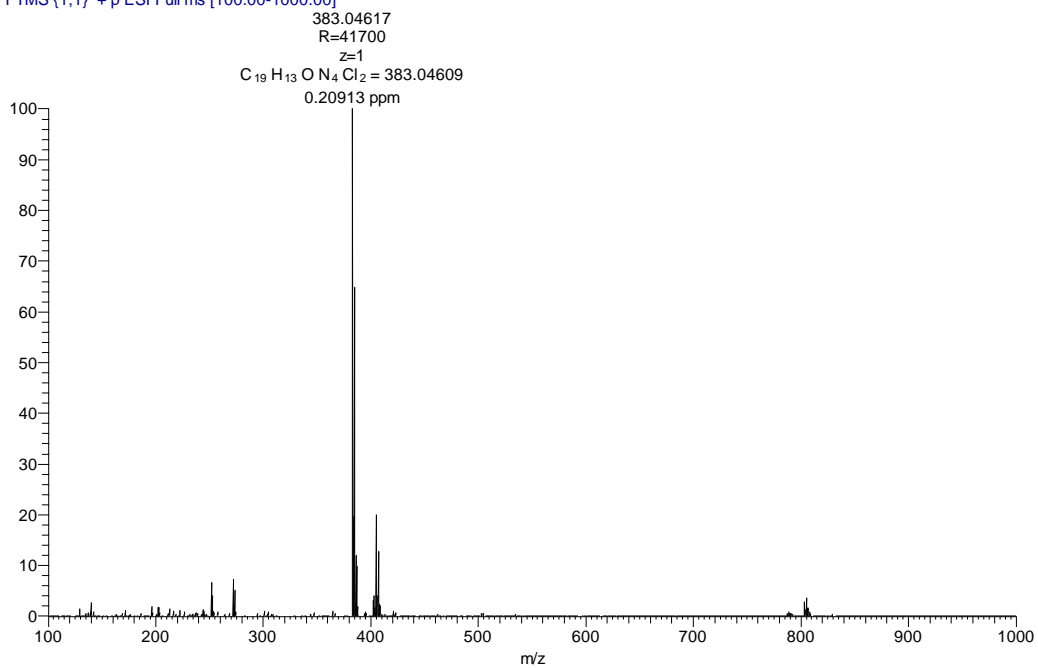

$^1\text{H}$  NMR,  $^{13}\text{C}$  NMR and HRMS spectra of the compound **T18**

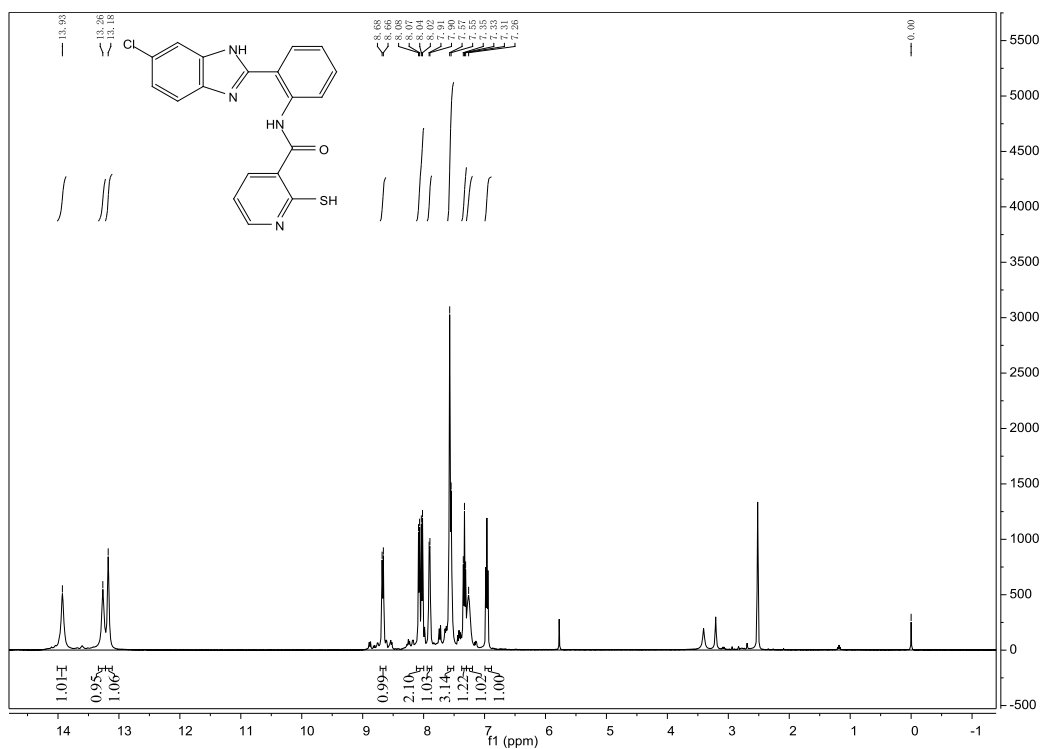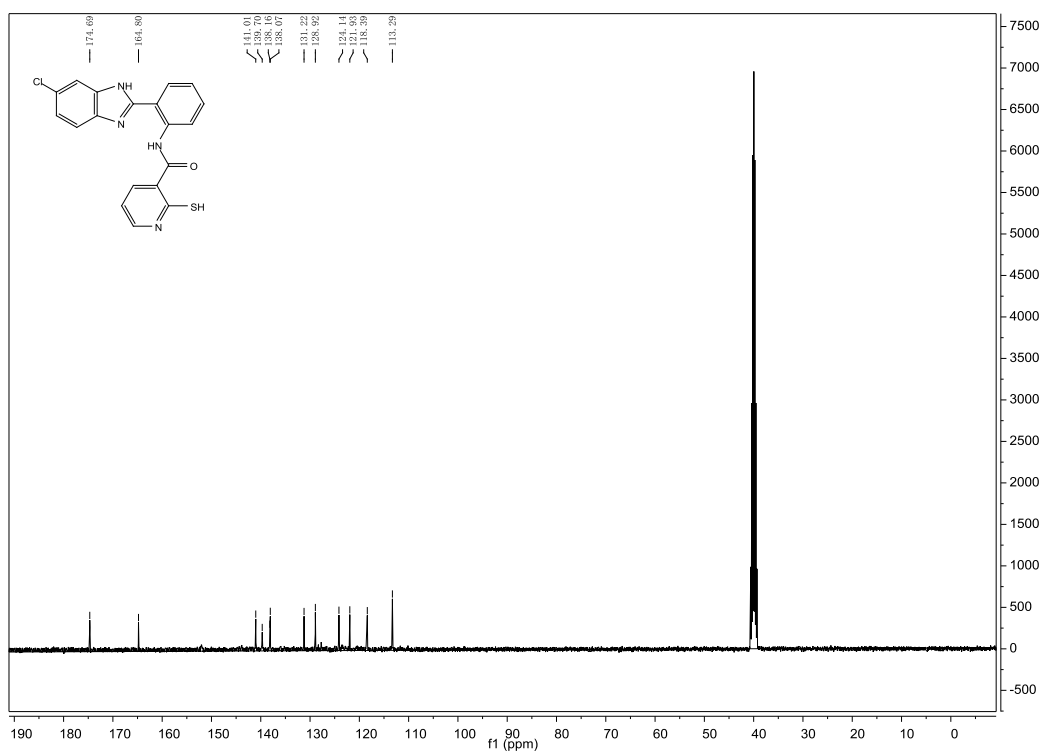

B40 #11 RT: 0.16 AV: 1 NL: 1.81E7  
T: FTMS (1,1) + p ESI Full ms [100.00-1000.00]

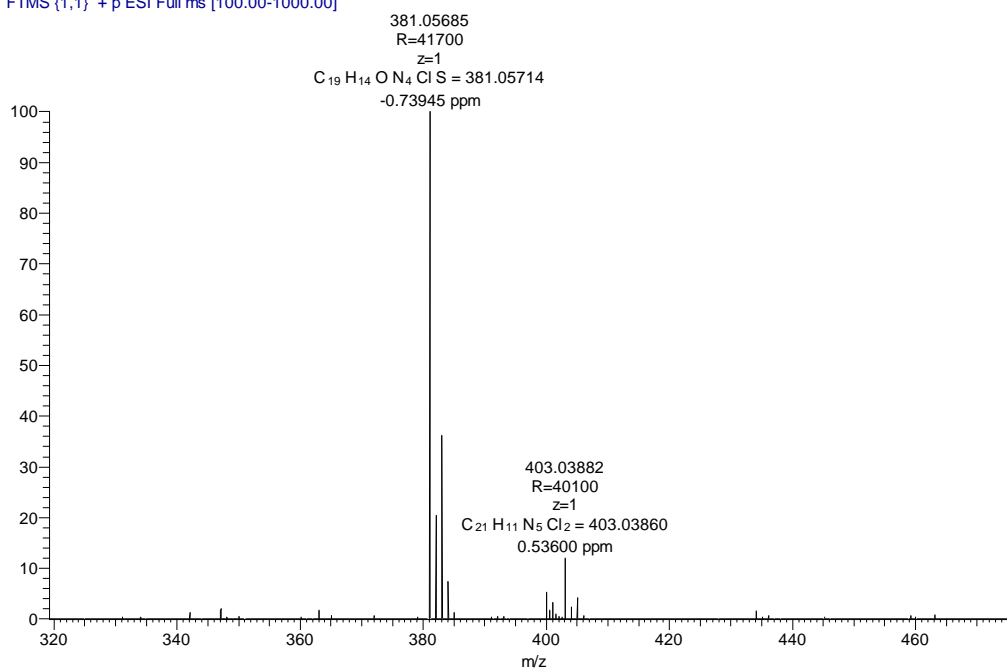

<sup>1</sup>H NMR, <sup>13</sup>C NMR and HRMS spectra of the compound T19

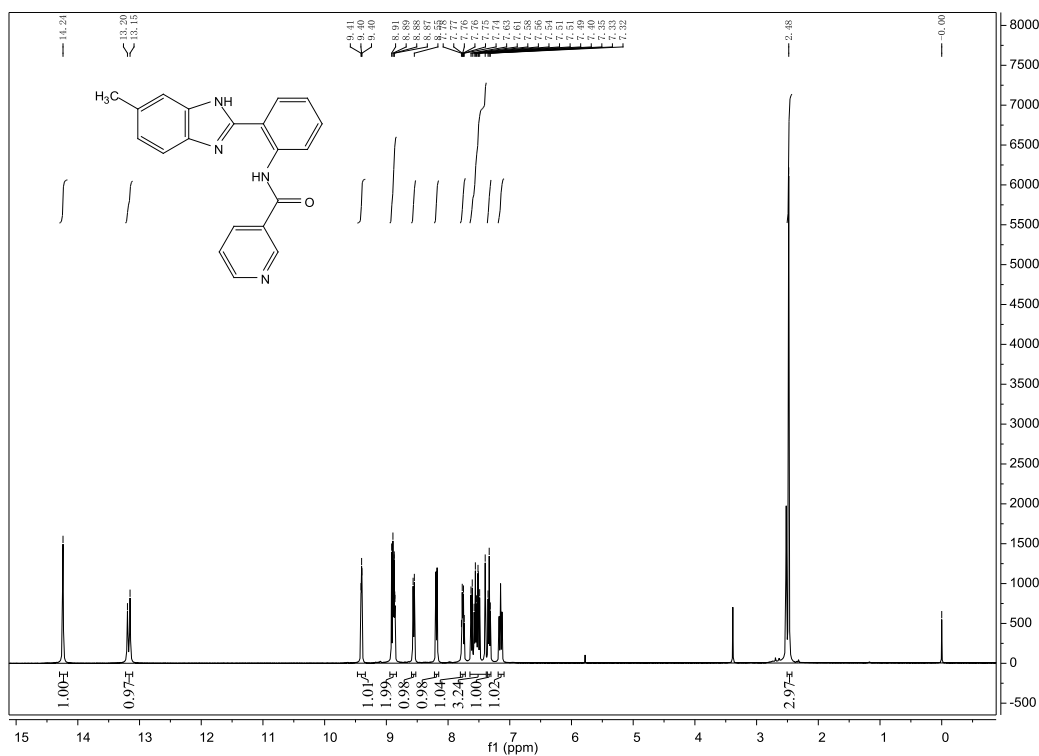

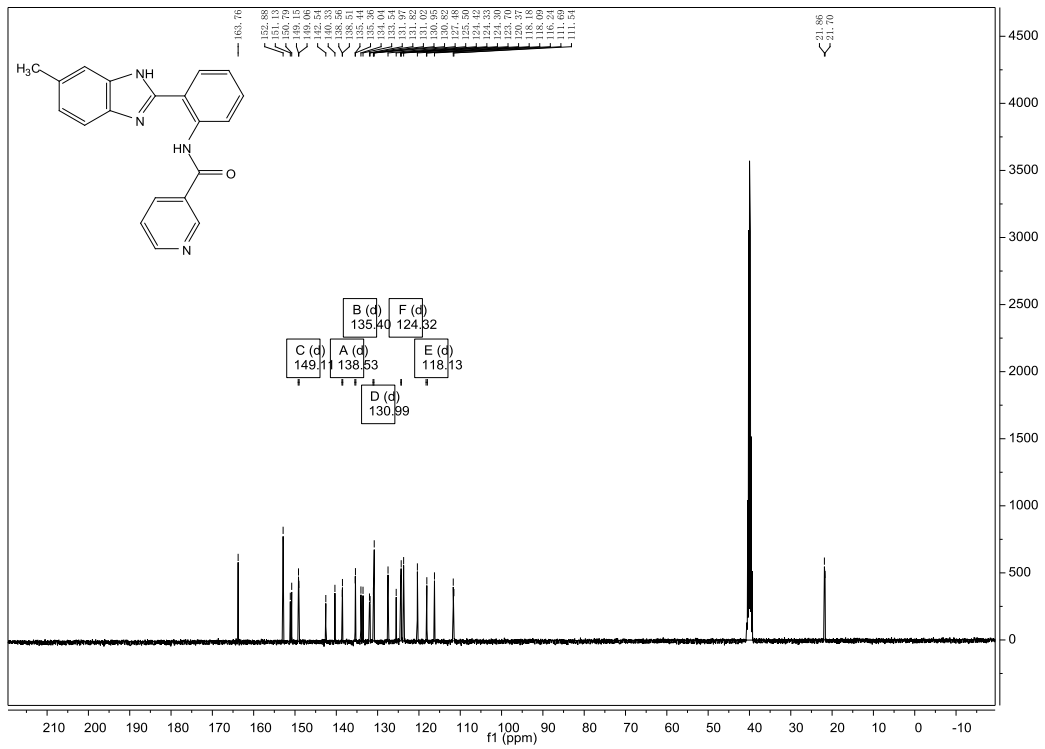

B45 #21 RT: 0.34 AV: 1 NL: 1.49E6  
 T: FTMS (1,1) + p ESI Full ms [100.00-1000.00]

329.13992  
 R=44400  
 z=1  
 C<sub>20</sub>H<sub>17</sub>O N<sub>4</sub> = 329.13969  
 0.71515 ppm

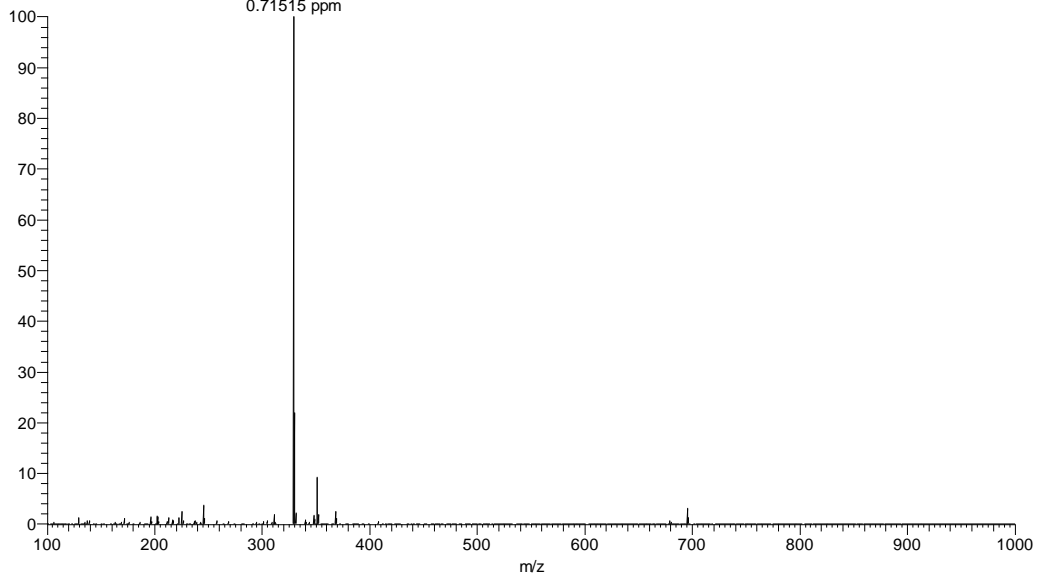

$^1\text{H}$  NMR,  $^{13}\text{C}$  NMR and HRMS spectra of the compound **T20**

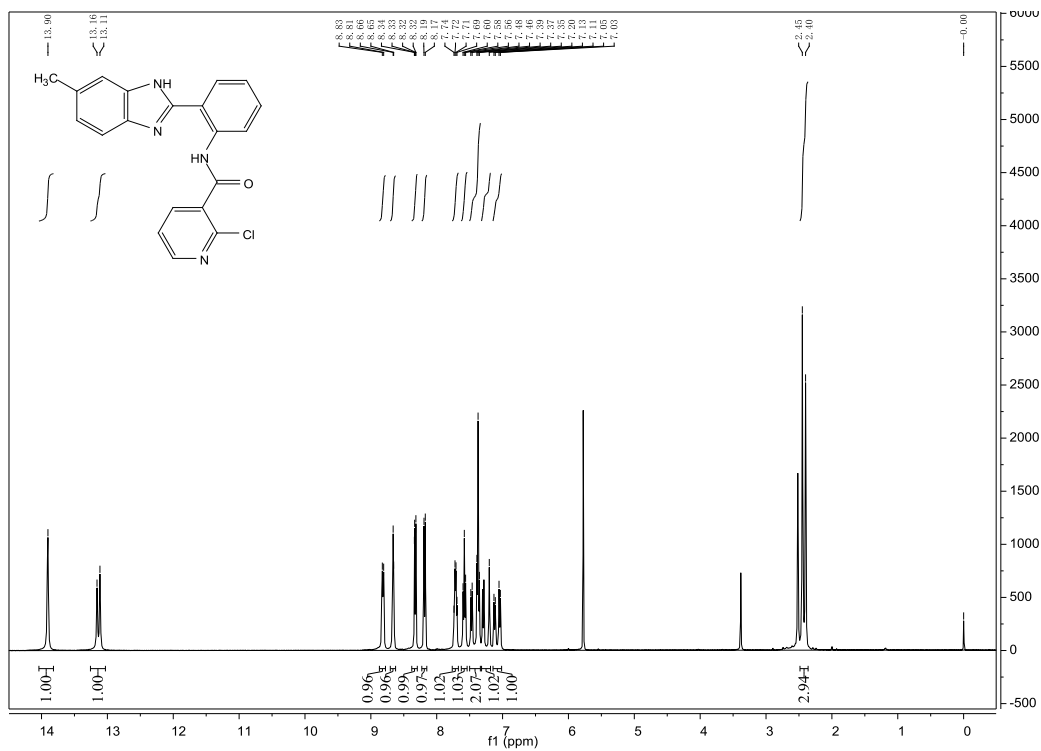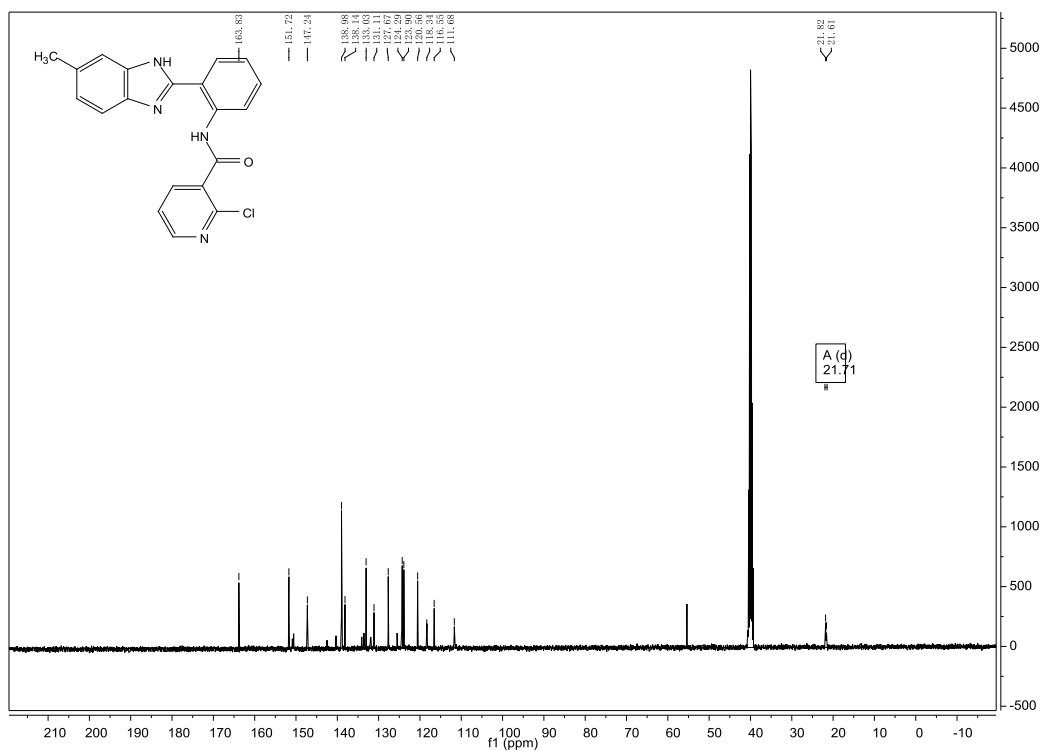

B46 #29 RT: 0.41 AV: 1 NL: 2.53E6  
T: FTMS (1,1) + p ESI Full ms [100.00-1000.00]  
363.10059  
R=43000  
z=1  
C<sub>20</sub>H<sub>16</sub>O N<sub>4</sub>Cl = 363.10072  
-0.35649 ppm

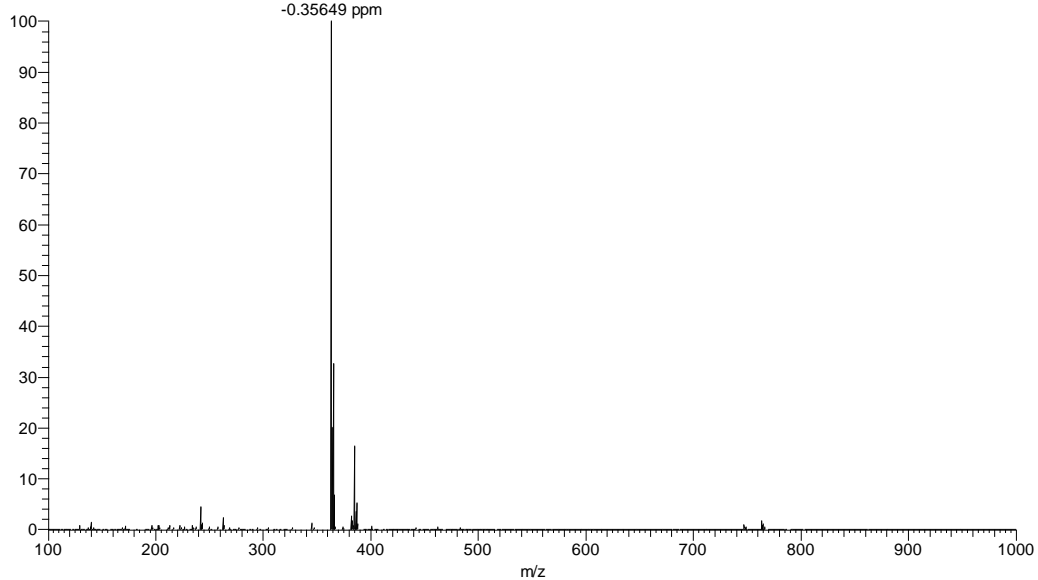

### FTIR spectra of the compound T1

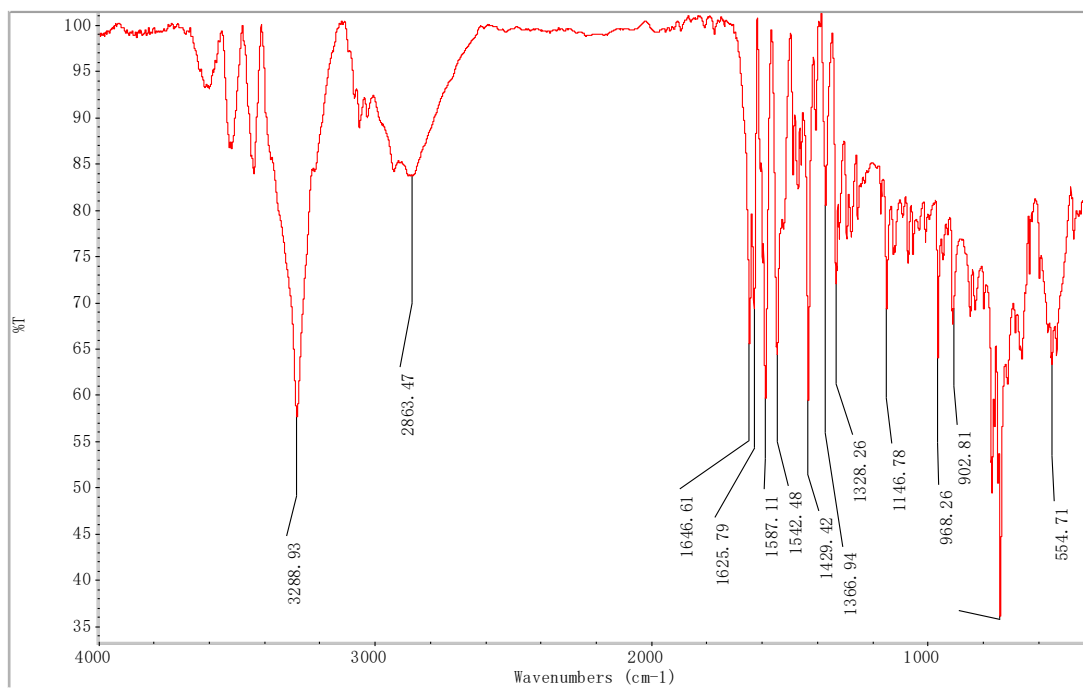



### FTIR spectra of the compound T2

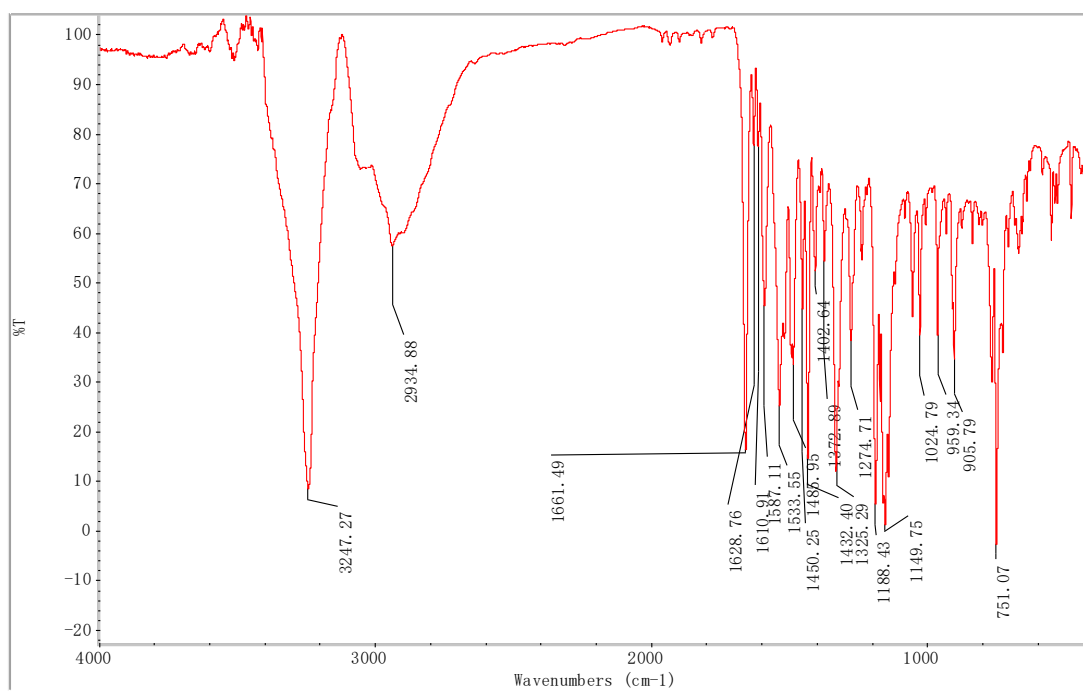

### FTIR spectra of the compound T3

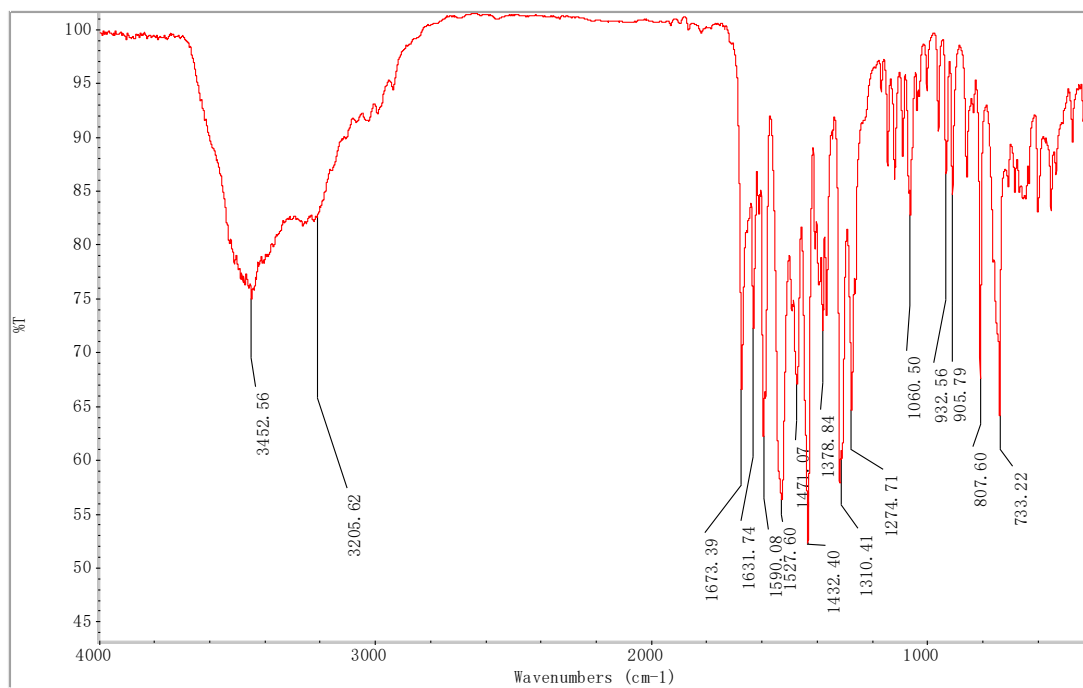

### FTIR spectra of the compound T4

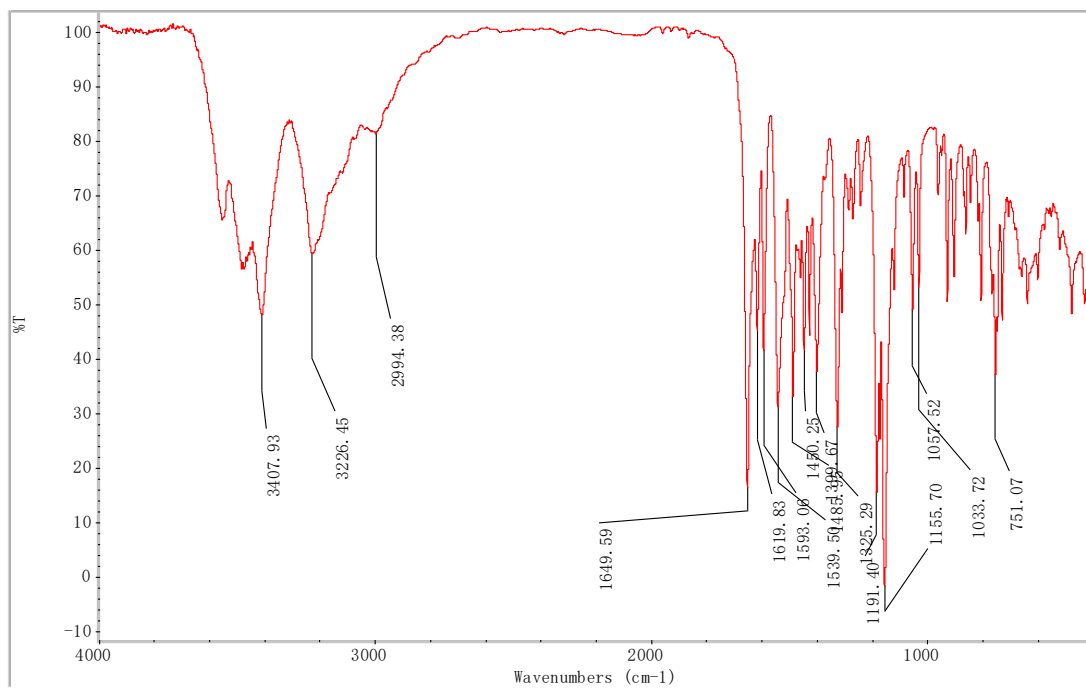

### FTIR spectra of the compound T5

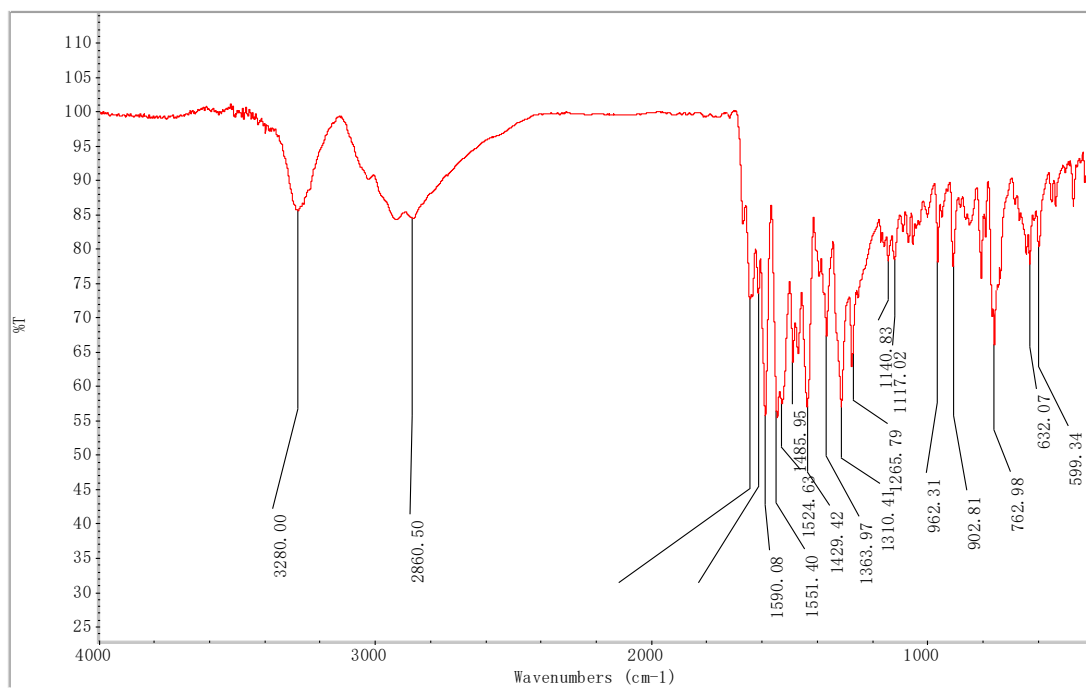

### FTIR spectra of the compound T6

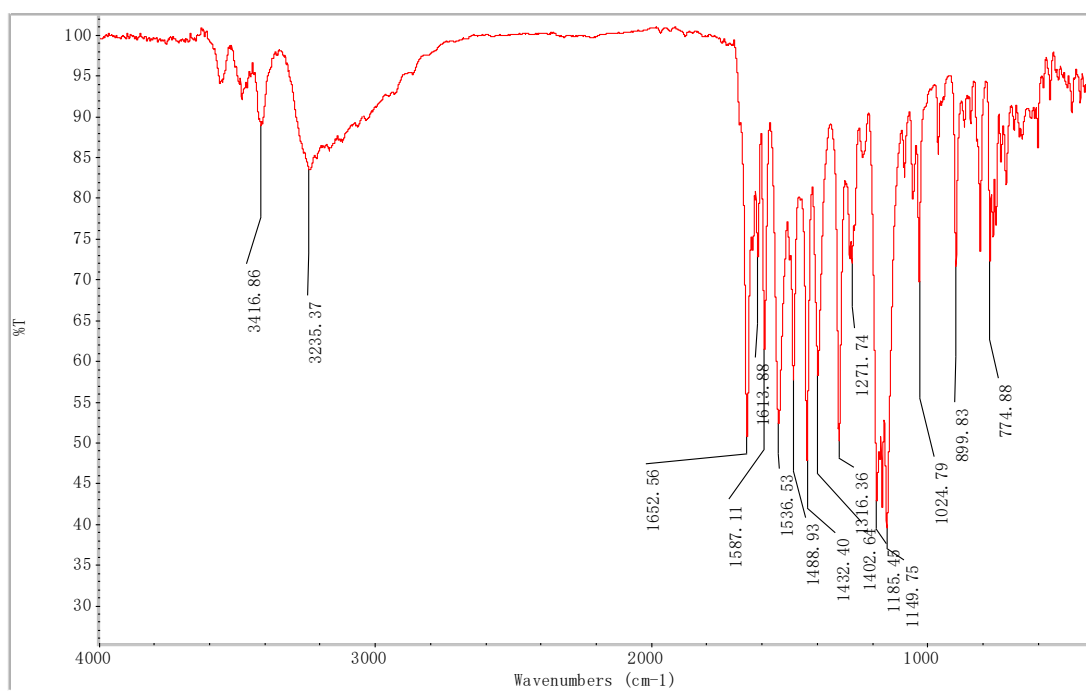

### FTIR spectra of the compound T7

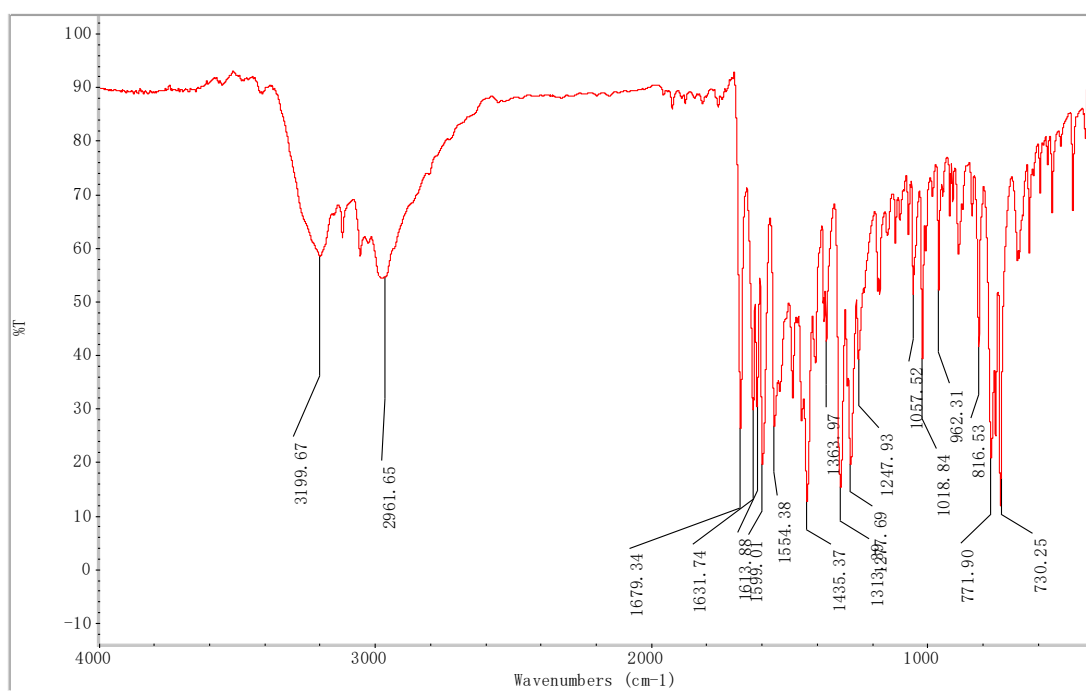

FTIR spectra of the compound T8

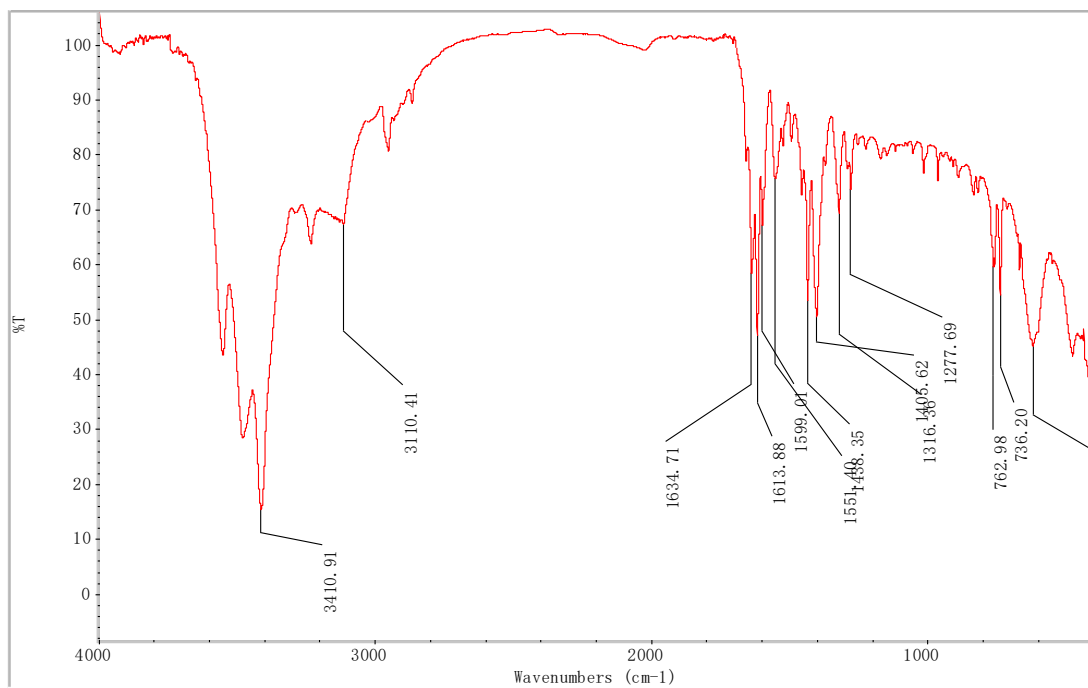

FTIR spectra of the compound T9

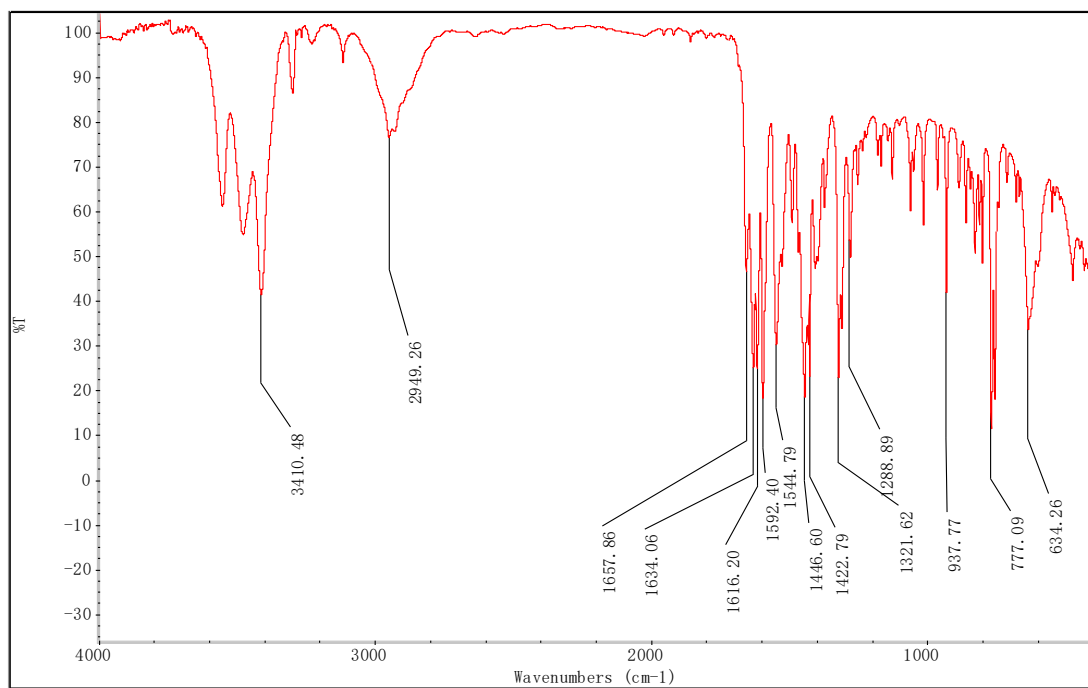

### FTIR spectra of the compound T10

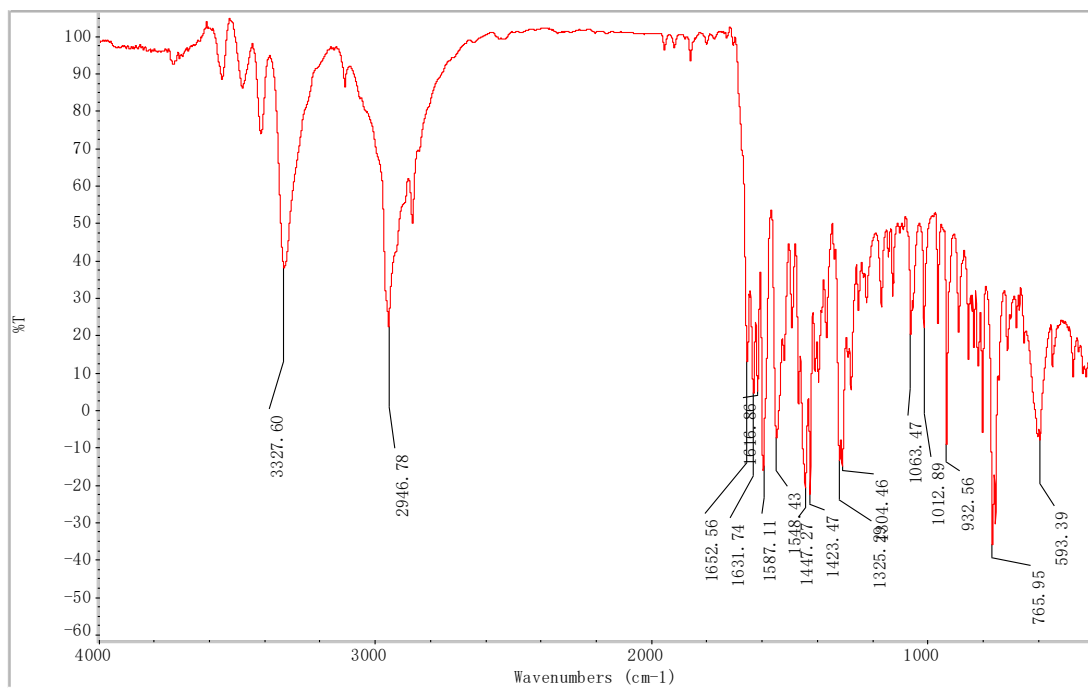

### FTIR spectra of the compound T11

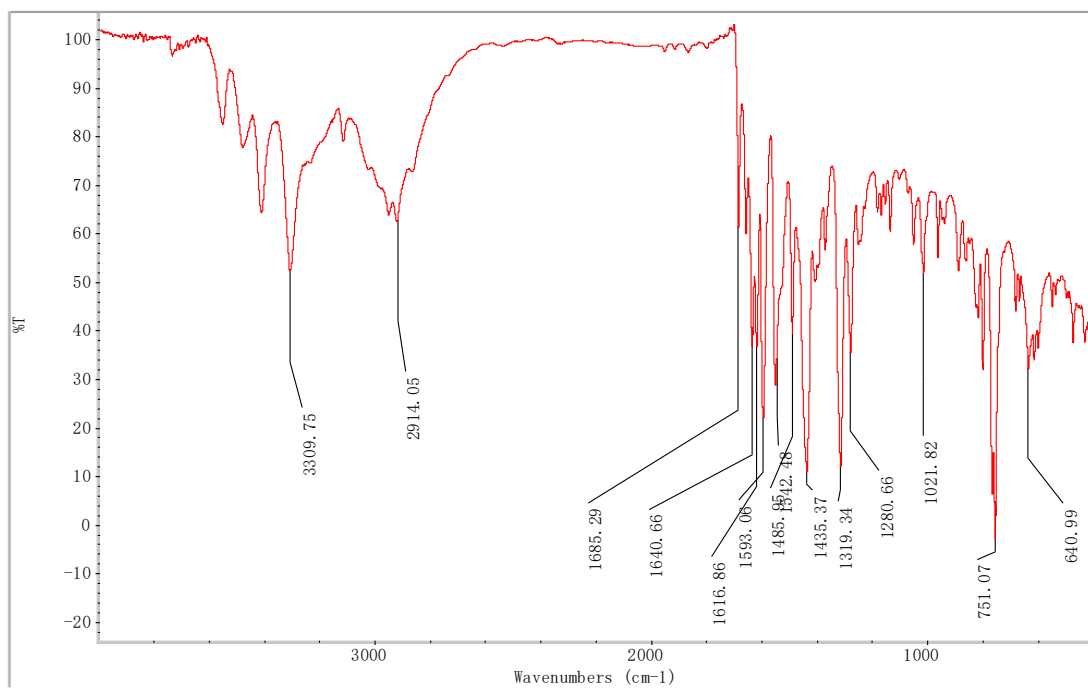

### FTIR spectra of the compound T12

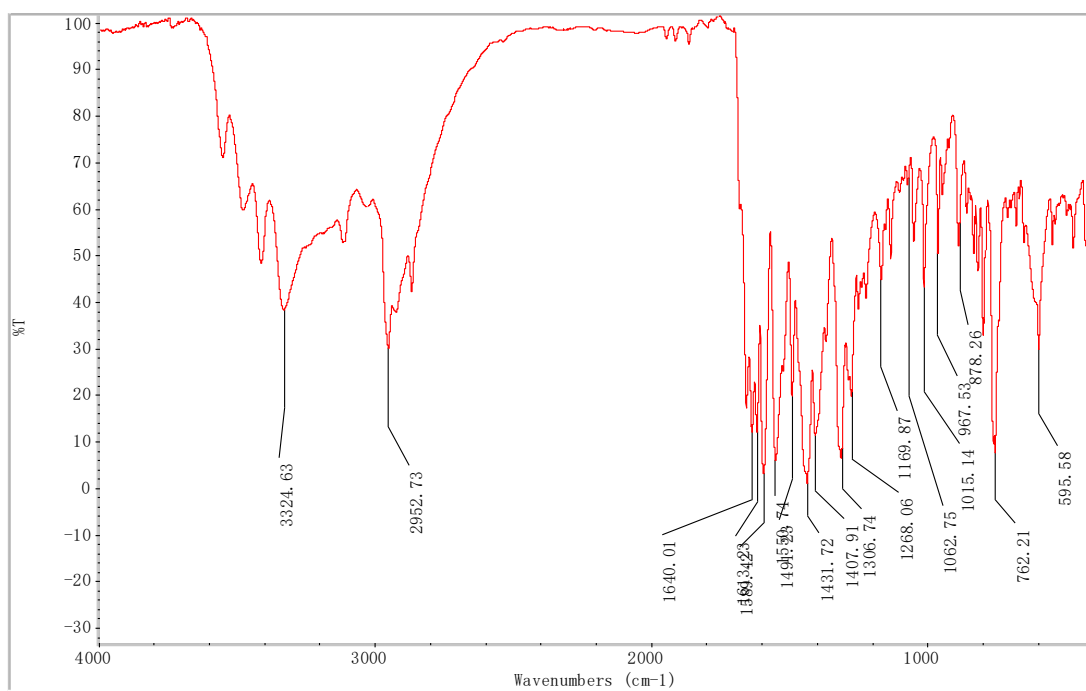

### FTIR spectra of the compound T13

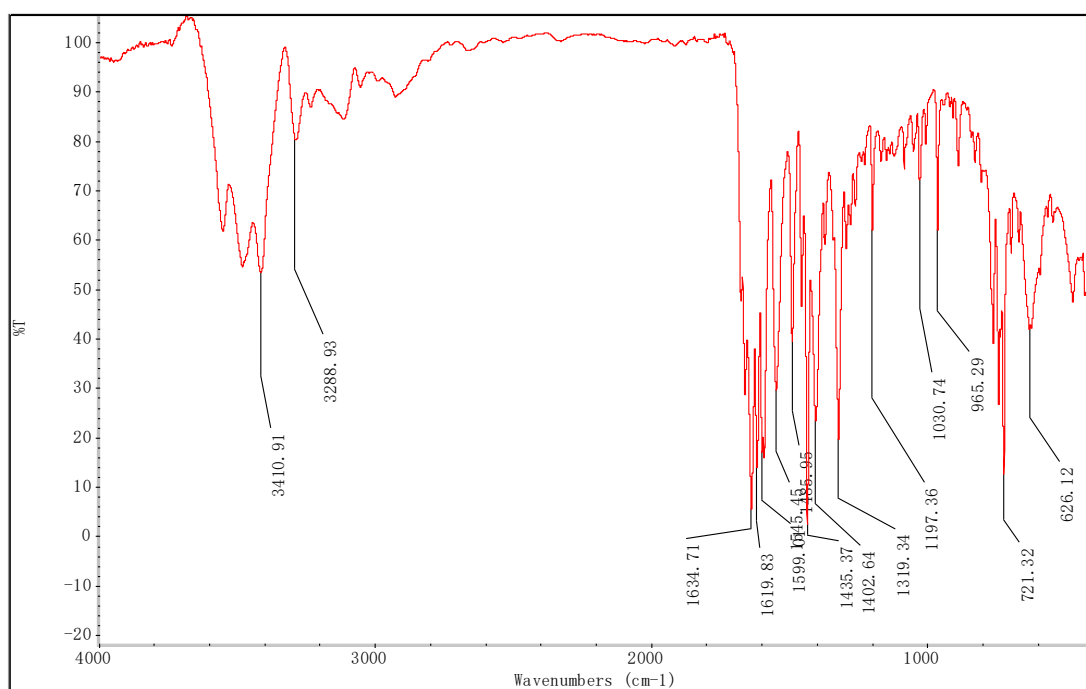

### FTIR spectra of the compound T14

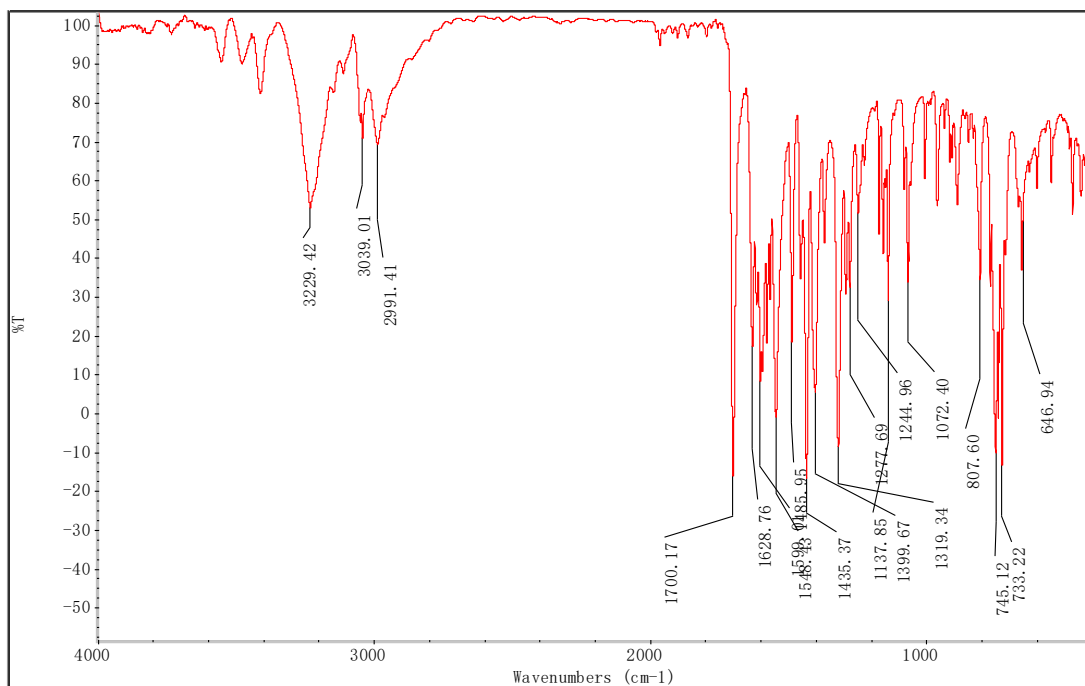

### FTIR spectra of the compound T15

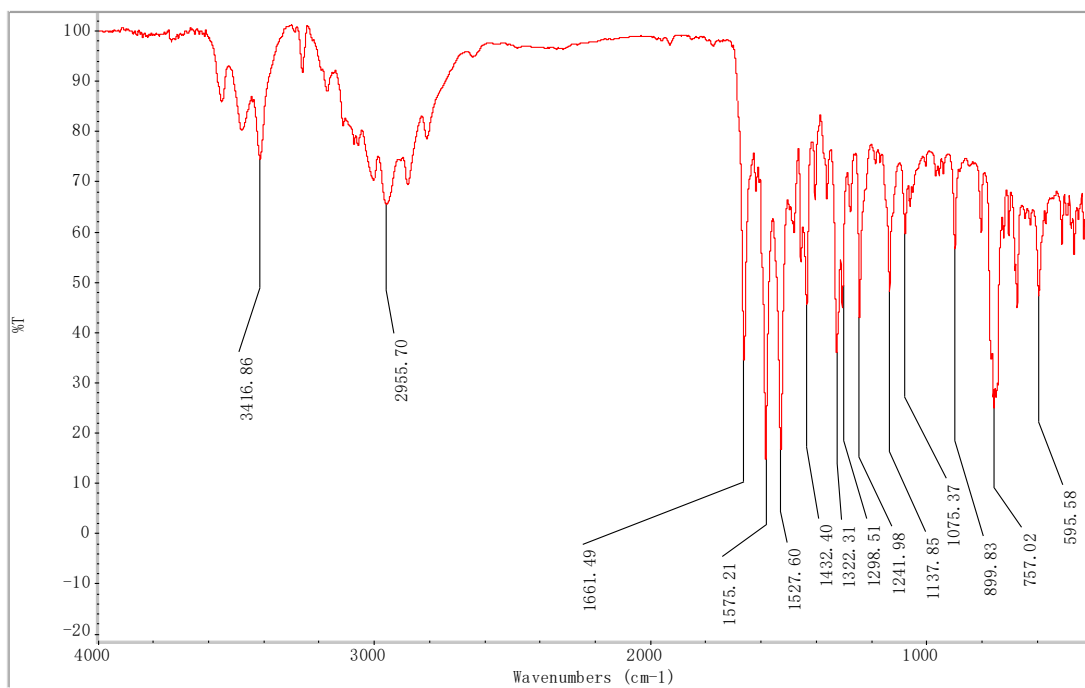

FTIR spectra of the compound **T16**

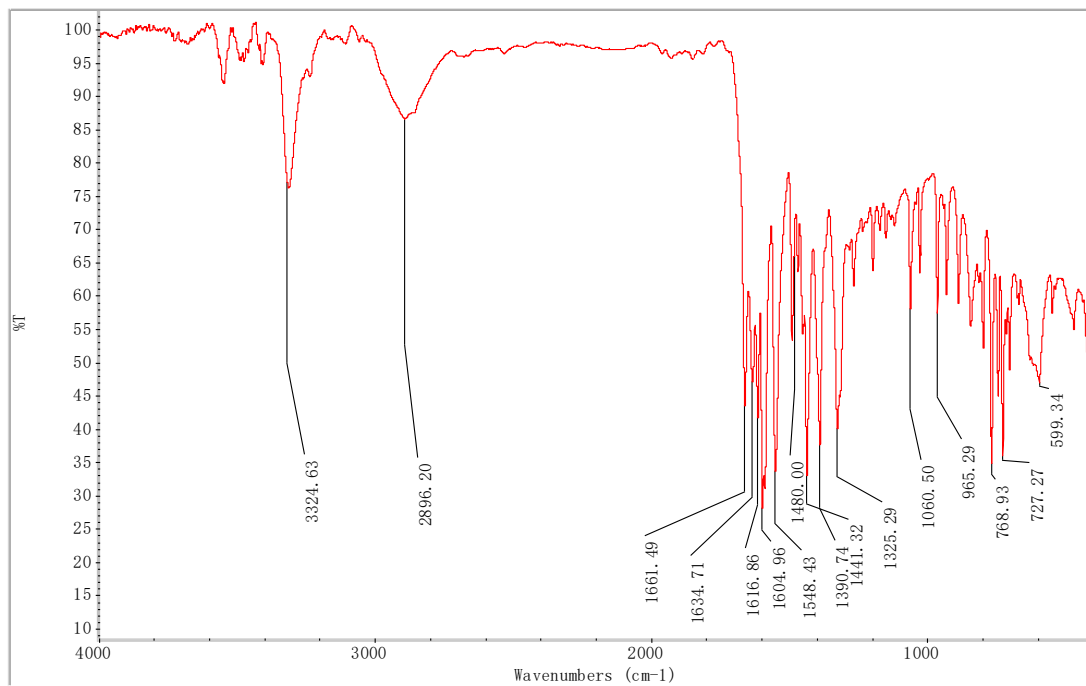

FTIR spectra of the compound **T17**

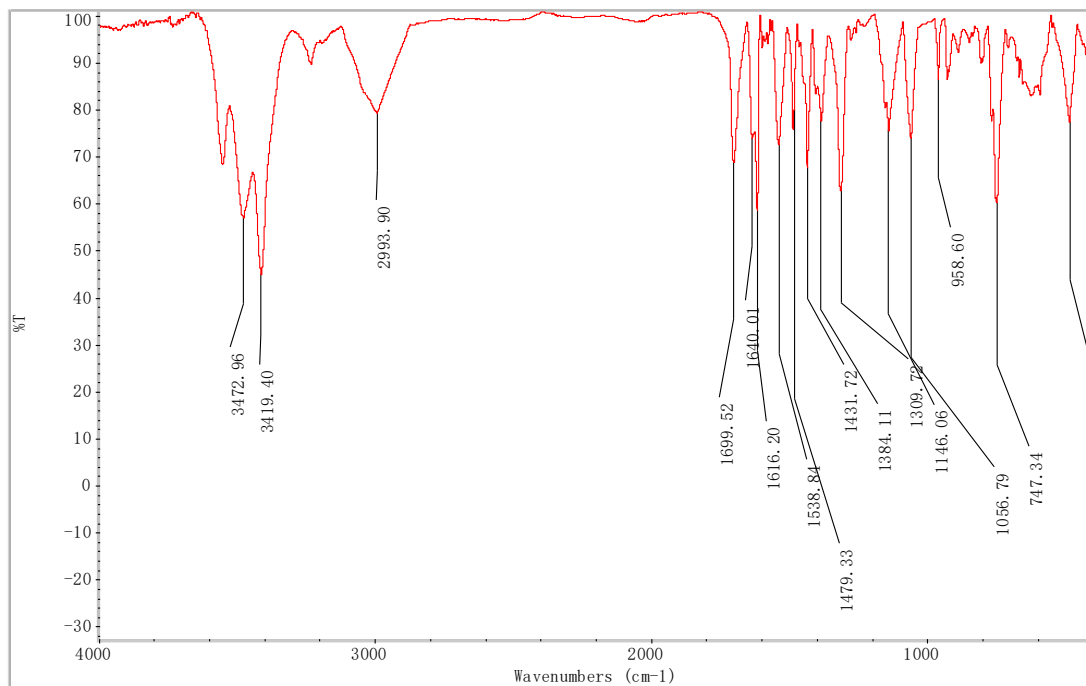



### FTIR spectra of the compound T18

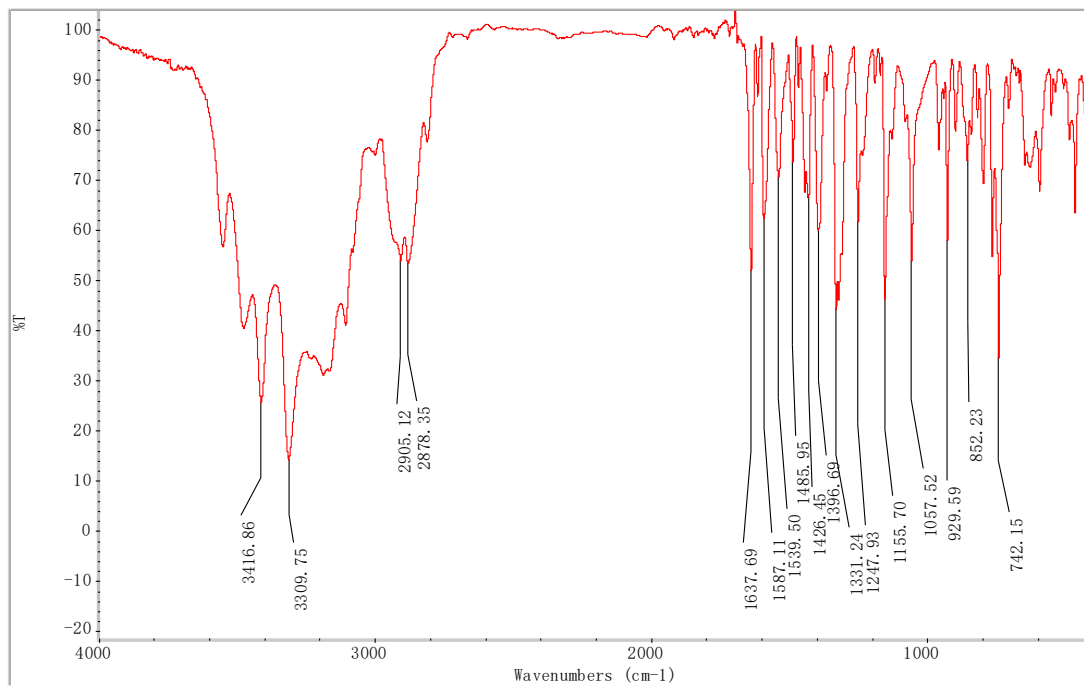

### FTIR spectra of the compound T19

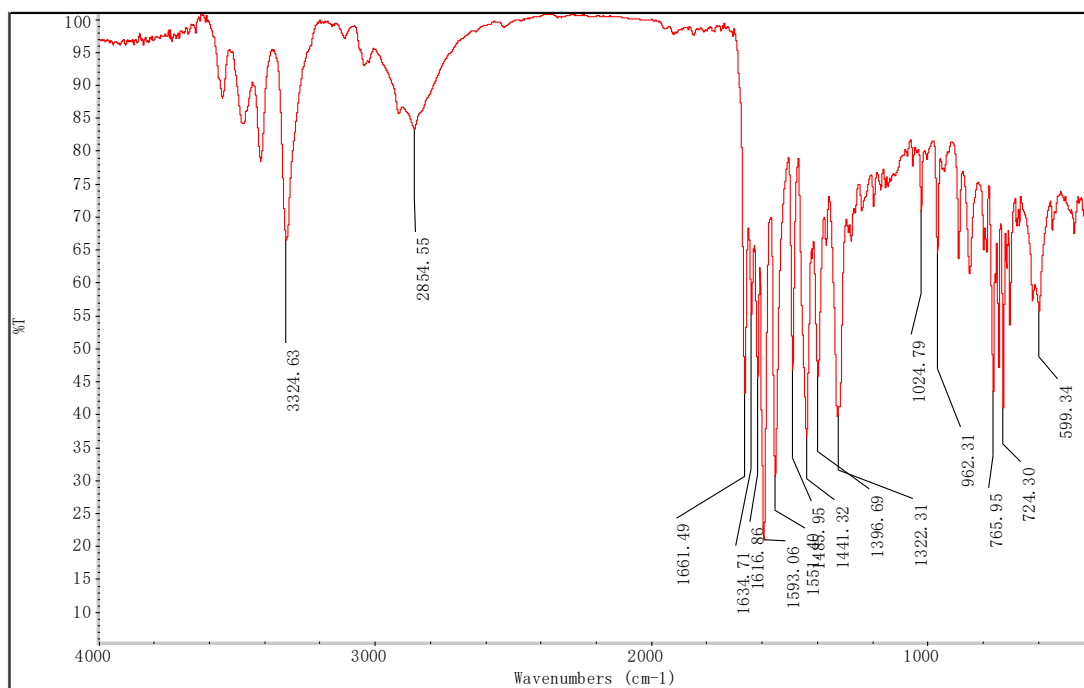

# FTIR spectra of the compound T20

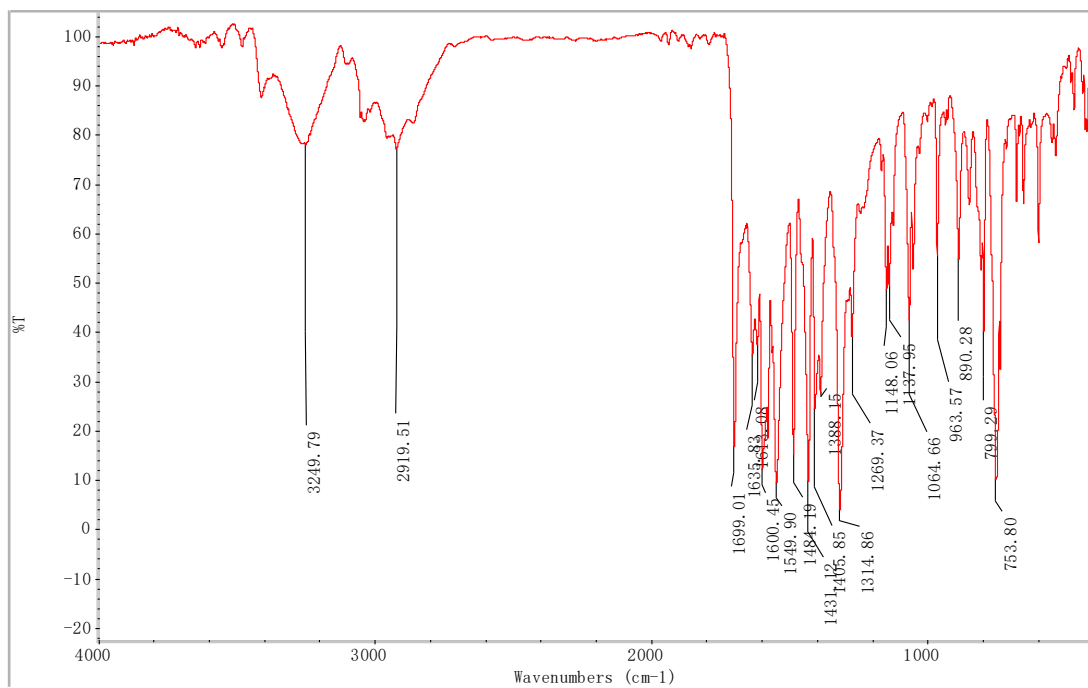

Supplement: c8nj05150j1.pdf [file c8nj05150j1.pdf]
